# Supplementary material
Source: HighWire-hosted journal article supplement (https://www.cfp.ca/highwire/filestream/36022/field_highwire_adjunct_files/0/Appendix_1.pdf)
Supplement: Appendix_1.pdf [file Appendix_1.pdf]

**PEER Systematic Review of Randomized Controlled Trials:  
Management of Chronic Low Back Pain in Primary Care  
Appendix 1: Search Terms and PRISMA diagrams**

Michael R. Kolber, Joey Ton, Betsy Thomas, Jessica Kirkwood, Samantha Moe, Nicolas Dugre, Karenn Chan, Adrienne J Lindblad, James McCormack, Scott Garrison, G. Michael Allan, Christina Korownyk, Rodger Craig, Logan Sept, Andrew Rouble, Danielle Perry

# Table of Contents

|                                                     |           |
|-----------------------------------------------------|-----------|
| <b>MEDLINE Searches</b> .....                       | <b>4</b>  |
| Acetaminophen.....                                  | 4         |
| Acupuncture .....                                   | 8         |
| Anticonvulsants .....                               | 9         |
| Cannabinoids .....                                  | 10        |
| Corticosteroid Injections.....                      | 12        |
| Exercise.....                                       | 13        |
| Muscle Relaxants .....                              | 14        |
| Opioids .....                                       | 15        |
| Oral Non-Steroidal Anti-Inflammatory Drugs.....     | 17        |
| Rubefaciants .....                                  | 22        |
| Spinal Manipulation .....                           | 25        |
| Selective Serotonin Reuptake Inhibitors.....        | 26        |
| Tricyclic Antidepressants .....                     | 29        |
| Topical Non-Steroidal Anti-Inflammatory Drugs ..... | 31        |
| <b>EMBASE Searches</b> .....                        | <b>37</b> |
| Acetaminophen.....                                  | 37        |
| Acupuncture .....                                   | 38        |
| Anticonvulsants .....                               | 39        |
| Cannabinoids .....                                  | 40        |
| Corticosteroid Injections.....                      | 41        |
| Exercise.....                                       | 42        |
| Muscle Relaxants .....                              | 43        |
| Opioids .....                                       | 44        |
| Oral Non-Steroidal Anti-Inflammatory Drugs.....     | 45        |
| Rubefaciants .....                                  | 47        |
| Serotonin Norepinephrine Reuptake Inhibitors .....  | 49        |
| Spinal Manipulation .....                           | 50        |
| Selective Serotonin Reuptake Inhibitors.....        | 51        |
| Tricyclic Antidepressants .....                     | 52        |

|                                                                                          |           |
|------------------------------------------------------------------------------------------|-----------|
| Topical Non-Steroidal Anti-Inflammatory Drugs .....                                      | 54        |
| <b>PRISMA Figures .....</b>                                                              | <b>56</b> |
| <b>Figure 1: PRISMA study flow: Acetaminophen .....</b>                                  | <b>56</b> |
| <b>Figure 2: PRISMA study flow: Acupuncture .....</b>                                    | <b>57</b> |
| <b>Figure 3: PRISMA study flow: Anticonvulsants .....</b>                                | <b>58</b> |
| <b>Figure 4: PRISMA study flow: Cannabinoids.....</b>                                    | <b>59</b> |
| <b>Figure 5: PRISMA study flow: Corticosteroid Injections .....</b>                      | <b>60</b> |
| <b>Figure 6: PRISMA study flow: Exercise .....</b>                                       | <b>61</b> |
| <b>Figure 7: PRISMA study flow: Muscle Relaxants.....</b>                                | <b>62</b> |
| <b>Figure 8: PRISMA study flow: Opioids.....</b>                                         | <b>63</b> |
| <b>Figure 9: PRISMA study flow: Oral Non-Steroidal Anti-Inflammatory Drugs .....</b>     | <b>64</b> |
| <b>Figure 10: PRISMA study flow: Rubefaciants.....</b>                                   | <b>65</b> |
| <b>Figure 11: PRISMA study flow: Serotonin Norepinephrine Reuptake Inhibitors .....</b>  | <b>66</b> |
| <b>Figure 12: PRISMA study flow: Spinal Manipulation .....</b>                           | <b>67</b> |
| <b>Figure 13: PRISMA study flow: Selective Serotonin Reuptake Inhibitors .....</b>       | <b>68</b> |
| <b>Figure 14: PRISMA study flow: Tricyclic Antidepressants.....</b>                      | <b>69</b> |
| <b>Figure 15: PRISMA study flow: Topical Non-Steroidal Anti-Inflammatory Drugs .....</b> | <b>70</b> |

## MEDLINE Searches

Acetaminophen

1. randomized controlled trial.pt.
2. clinical trial.pt.
3. randomi?ed.ti,ab.
4. placebo.ti,ab.
5. dt.fs.
6. randomly.ti,ab.
7. trial.ti,ab.
8. groups.ti,ab.
9. or/1-8
10. animals/
11. humans/
12. 10 not (10 and 11)
13. 9 not 12
14. back pain.mp.
15. Low Back Pain/
16. dorsalgia.mp.
17. backache.mp.
18. back ache.mp.
19. lumbago.mp.
20. Sciatica/
21. sciatica.mp.
22. coccydynia.mp.
23. coccyx.mp.
24. back disorder\*.mp.
25. spondylosis.mp.
26. (lumbar adj1 pain).mp.
27. ischialgia.mp.
28. radiculopath\*.mp.
29. 14 or 15 or 16 or 17 or 18 or 19 or 20 or 21 or 22 or 23 or 24 or 25 or 26 or 27 or 28
30. acetaminophen.mp. or exp Acetaminophen/
31. paracetamol.mp.
32. panadol.mp.
33. tylenol.mp.
34. abenol.mp.
35. aceta.mp.
36. actimin.mp.
37. anacin.mp.
38. apacet.mp.
39. acephen.mp.
40. "aspirin free anacin".mp.
41. acamol.mp.
42. acetalgin.mp.
43. adol.mp.
44. alvedon.mp.
45. apiretal.mp.
46. atamel.mp.

47. atasol.mp.  
48. benuron.mp.  
49. biogesic.mp.  
50. buscapina.mp.  
51. banesin.mp.  
52. calpol.mp.  
53. captin.mp.  
54. cemol.mp.  
55. cetaphen.mp.  
56. coldex.mp.  
57. cotibin.mp.  
58. crocin.mp.  
59. dafalgan.mp.  
60. daleron.mp.  
61. depon.mp.  
62. dexamol.mp.  
63. dolex.mp.  
64. dolgesic.mp.  
65. doliprane.mp.  
66. dolorol.mp.  
67. dolprone.mp.  
68. dapa.mp.  
69. dolo.mp.  
70. datril.mp.  
71. duatrol.mp.  
72. dayquil.mp.  
73. efferalgan.mp.  
74. enelfa.mp.  
75. europain.mp.  
76. febrectal.mp.  
77. febricet.mp.  
78. febridol.mp.  
79. fensum.mp.  
80. feverall.mp.  
81. fibi.mp.  
82. gelocatil.mp.  
83. gripin.mp.  
84. genapap.mp.  
85. genebs.mp.  
86. hedex.mp.  
87. hedanol.mp.  
88. herron.mp.  
89. influbene.mp.  
90. kafa.mp.  
91. kitadol.mp.  
92. lekadol.mp.  
93. lupocet.mp.  
94. lemsip.mp.

95. liquiprin.mp.  
96. pyrigesic.mp.  
97. mexalen.mp.  
98. milidon.mp.  
99. minoset.mp.  
100. napa.mp.  
101. neopap.mp.  
102. novo-gesic.mp.  
103. oraphen pd.mp.  
104. pacol.mp.  
105. pamol.mp.  
106. parol.mp.  
107. panado.mp.  
108. panamax.mp.  
109. panodil.mp.  
110. pharbetol.mp.  
111. paracet.mp.  
112. paracitol.mp.  
113. paralen.mp.  
114. paramed.mp.  
115. paramol.mp.  
116. perdolan.mp.  
117. perfalgan.mp.  
118. pinex.mp.  
119. pyrenol.mp.  
120. plicet.mp.  
121. panadrex.mp.  
122. paratabs.mp.  
123. paralgin.mp.  
124. phenaphen.mp.  
125. revanin.mp.  
126. rokamol.mp.  
127. rubophen.mp.  
128. redutemp.mp.  
129. scanol.mp.  
130. suppap.mp.  
131. tachipirin.mp.  
132. tachipirina.mp.  
133. tafirol.mp.  
134. tapsin.mp.  
135. termalgin.mp.  
136. temprap.mp.  
137. thomapyrin.mp.  
138. tipol.mp.  
139. treuphadol.mp.  
140. triaminic.mp.  
141. tamen.mp.  
142. tapanol.mp.

- 143. uphamol.mp.
- 144. vermidon.mp.
- 145. vitamol.mp.
- 146. valorin.mp.
- 147. xumadol.mp.
- 148. zolben.mp.
- 149. midol.mp.
- 150. mapap.mp.
- 151. ofirmev.mp.
- 152. 30 or 31 or 32 or 33 or 34 or 35 or 36 or 37 or 38 or 39 or 40 or 41 or 42 or 43 or 44 or 45 or 46 or 47 or 48 or 49 or 50 or 51 or 52 or 53 or 54 or 55 or 56 or 57 or 58 or 59 or 60 or 61 or 62 or 63 or 64 or 65 or 66 or 67 or 68 or 69 or 70 or 71 or 72 or 73 or 74 or 75 or 76 or 77 or 78 or 79 or 80 or 81 or 82 or 83 or 84 or 85 or 86 or 87 or 88 or 89 or 90 or 91 or 92 or 93 or 94 or 95 or 96 or 97 or 98 or 99 or 100 or 101 or 102 or 103 or 104 or 105 or 106 or 107 or 108 or 109 or 110 or 111 or 112 or 113 or 114 or 115 or 116 or 117 or 118 or 119 or 120 or 121 or 122 or 123 or 124 or 125 or 126 or 127 or 128 or 129 or 130 or 131 or 132 or 133 or 134 or 135 or 136 or 137 or 138 or 139 or 140 or 141 or 142 or 143 or 144 or 145 or 146 or 147 or 148 or 149 or 150 or 151
- 153. 13 and 29 and 152

## Acupuncture

1. acupressure.mp. or exp Acupressure/
2. electroacupunct\*.mp.
3. acupuncture therapy/ or acupuncture analgesia/
4. acupunct\*.mp.
5. acupoint\*.mp.
6. Acupuncture Points/
7. Electroacupuncture/
8. 1 or 2 or 3 or 4 or 5 or 6 or 7
9. Low Back Pain/
10. back pain.mp.
11. dorsalgia.mp.
12. lumbago.mp.
13. Sciatica/
14. sciatica.mp.
15. coccydynia.mp.
16. (lumbar adj1 pain).mp. [mp=title, abstract, original title, name of substance word, subject heading word, floating sub-heading word, keyword heading word, organism supplementary concept word, protocol supplementary concept word, rare disease supplementary concept word, unique identifier, synonyms]
17. backache.mp.
18. back ache.mp.
19. 9 or 10 or 11 or 12 or 13 or 14 or 15 or 16 or 17 or 18
20. randomized controlled trial.pt.
21. clinical trial.pt.
22. randomi?ed.ti,ab.
23. placebo.ti,ab.
24. dt.fs.
25. randomly.ti,ab.
26. trial.ti,ab.
27. groups.ti,ab.
28. or/20-27
29. animals/
30. humans/
31. 29 not (29 and 30)
32. 28 not 31
33. 8 and 19 and 32



## Anticonvulsants

1. randomized controlled trial.pt.
2. clinical trial.pt.
3. randomi?ed.ti,ab.
4. placebo.ti,ab.
5. dt.fs.
6. randomly.ti,ab.
7. trial.ti,ab.
8. groups.ti,ab.
9. or/1-8
10. animals/
11. humans/
12. 10 not (10 and 11)
13. 9 not 12
14. back pain.mp.
15. Low Back Pain/
16. dorsalgia.mp.
17. backache.mp.
18. back ache.mp.
19. lumbago.mp.
20. Sciatica/
21. sciatica.mp.
22. coccydynia.mp.
23. coccyx.mp.
24. back disorder\*.mp.
25. spondylosis.mp.
26. (lumbar adj1 pain).mp.
27. ischialgia.mp.
28. radiculopath\*.mp.
29. 14 or 15 or 16 or 17 or 18 or 19 or 20 or 21 or 22 or 23 or 24 or 25 or 26 or 27 or 28
30. anticonvulsant.mp. or exp Anticonvulsants/
31. gabapentin.mp. or exp Gabapentin/
32. neuontin.mp.
33. pregabalin.mp. or exp Pregabalin/
34. lyrica.mp.
35. 30 or 31 or 32 or 33 or 34
36. 13 and 29 and 35

## Cannabinoids

1. randomized controlled trial.pt.
2. clinical trial.pt.
3. randomi?ed.ti,ab.
4. placebo.ti,ab.
5. dt.fs.
6. randomly.ti,ab.
7. trial.ti,ab.
8. groups.ti,ab.
9. or/1-8
10. animals/
11. humans/
12. 10 not (10 and 11)
13. 9 not 12
14. back pain.mp.
15. Low Back Pain/
16. dorsalgia.mp.
17. backache.mp.
18. back ache.mp.
19. lumbago.mp.
20. Sciatica/
21. sciatica.mp.
22. coccydynia.mp.
23. coccyx.mp.
24. back disorder\*.mp.
25. spondylosis.mp.
26. (lumbar adj1 pain).mp.
27. ischialgia.mp.
28. radiculopath\*.mp.
29. 14 or 15 or 16 or 17 or 18 or 19 or 20 or 21 or 22 or 23 or 24 or 25 or 26 or 27 or 28
30. cannabis.mp. or exp Cannabis/
31. marijuana.mp.
32. ganka.mp.
33. hashish.mp.
34. marihuana.mp.
35. bhang.mp.
36. cannabinoid.mp. or exp Cannabinoids/
37. dronabinol.mp.
38. marinol.mp.
39. nabilone.mp.
40. cesamet.mp.
41. dexamabinol.mp.
42. tetrahydrocannabinol-cannabidiol.mp.
43. sativex.mp.
44. tetrahydrocannabinol.mp.
45. epidiolex.mp.
46. shesha.mp.
47. suma.mp.

- 48. vingory.mp.
- 49. banji.mp.
- 50. charas.mp.
- 51. dagga.mp.
- 52. esrar.mp.
- 53. ganja.mp.
- 54. hemp.mp.
- 55. idrasil.mp.
- 56. kif.mp.
- 57. kief.mp.
- 58. machona.mp.
- 59. anascha.mp.
- 60. cannador.mp.
- 61. 30 or 31 or 32 or 33 or 34 or 35 or 36 or 37 or 38 or 39 or 40 or 41 or 42 or 43 or 44 or 45 or 46 or 47 or 48 or 49 or 50 or 51 or 52 or 53 or 54 or 55 or 56 or 57 or 58 or 59 or 60
- 62. 13 and 29 and 61

## Corticosteroid Injections

1. randomized controlled trial.pt.
2. clinical trial.pt.
3. randomi?ed.ti,ab.
4. placebo.ti,ab.
5. dt.fs.
6. randomly.ti,ab.
7. trial.ti,ab.
8. groups.ti,ab.
9. or/1-8
10. animals/
11. humans/
12. 10 not (10 and 11)
13. 9 not 12
14. back pain.mp.
15. Low Back Pain/
16. dorsalgia.mp.
17. backache.mp.
18. back ache.mp.
19. lumbago.mp.
20. Sciatica/
21. sciatica.mp.
22. coccydynia.mp.
23. coccyx.mp.
24. back disorder\*.mp.
25. spondylosis.mp.
26. (lumbar adj1 pain).mp.
27. ischialgia.mp.
28. radiculopath\*.mp.
29. 14 or 15 or 16 or 17 or 18 or 19 or 20 or 21 or 22 or 23 or 24 or 25 or 26 or 27 or 28
30. exp Injections/
31. steroid.mp.
32. corticosteroid.mp.
33. 31 or 32
34. 30 and 33
35. 13 and 29 and 34

## Exercise

1. randomized controlled trial.pt.
2. clinical trial.pt.
3. randomi?ed.ti,ab.
4. placebo.ti,ab.
5. dt.fs.
6. randomly.ti,ab.
7. trial.ti,ab.
8. groups.ti,ab.
9. or/1-8
10. animals/
11. humans/
12. 10 not (10 and 11)
13. 9 not 12
14. back pain.mp.
15. Low Back Pain/
16. dorsalgia.mp.
17. backache.mp.
18. back ache.mp.
19. lumbago.mp.
20. Sciatica/
21. sciatica.mp.
22. coccydynia.mp.
23. coccyx.mp.
24. back disorder\*.mp.
25. spondylosis.mp.
26. (lumbar adj1 pain).mp.
27. ischialgia.mp.
28. radiculopath\*.mp.
29. 14 or 15 or 16 or 17 or 18 or 19 or 20 or 21 or 22 or 23 or 24 or 25 or 26 or 27 or 28
30. exp \*Exercise Movement Techniques/
31. exp \*Exercise Therapy/
32. exercis\*.ab. /freq=3
33. exp \*Physical Fitness/
34. exp \*Exercise Test/
35. exp Exercise Tolerance/
36. ((strength\* or isometric\* or isotonic\* or isokinetic\* or aerobic\* or endurance or weight\*) adj5 (exercis\* or train\*)).ab,ti,kw.
37. physiotherap\*.ab. /freq=2
38. kinesiotherap\*.ab. /freq=2
39. \*rehabilitation/ or occupational therapy/ or recreation therapy/
40. physical activity.ab. /freq=2 or exp \*Exercise/
41. muscle strength\*.mp.
42. (tai ji or tai chi).tw.
43. exp \*Yoga/
44. yoga.ab. /freq=2
45. 30 or 31 or 32 or 33 or 34 or 35 or 36 or 37 or 38 or 39 or 40 or 41 or 42 or 43 or 44
46. 13 and 29 and 45

## Muscle Relaxants

1. randomized controlled trial.pt.
2. clinical trial.pt.
3. randomi?ed.ti,ab.
4. placebo.ti,ab.
5. dt.fs.
6. randomly.ti,ab.
7. trial.ti,ab.
8. groups.ti,ab.
9. or/1-8
10. animals/
11. humans/
12. 10 not (10 and 11)
13. 9 not 12
14. back pain.mp.
15. Low Back Pain/
16. dorsalgia.mp.
17. backache.mp.
18. back ache.mp.
19. lumbago.mp.
20. Sciatica/
21. sciatica.mp.
22. coccydynia.mp.
23. coccyx.mp.
24. back disorder\*.mp.
25. spondylosis.mp.
26. (lumbar adj1 pain).mp.
27. ischialgia.mp.
28. radiculopath\*.mp.
29. 14 or 15 or 16 or 17 or 18 or 19 or 20 or 21 or 22 or 23 or 24 or 25 or 26 or 27 or 28
30. exp Muscle Relaxants, Central/
31. muscle relaxant\*.ti,ab,kw.
32. (cyclobenzaprine or amrix or fexmid or flexeril or baclofen or gablofen or lioresal or ozobax or methocarbamol or Robaxin or orphenadrine or norflex or disipal or drinexin or epiflex or lysantin or mefamina).ti,ab,kw.
33. 30 or 31 or 32
34. 13 and 29 and 33

## Opioids

1. randomized controlled trial.pt.
2. clinical trial.pt.
3. randomi?ed.ti,ab.
4. placebo.ti,ab.
5. dt.fs.
6. randomly.ti,ab.
7. trial.ti,ab.
8. groups.ti,ab.
9. or/1-8
10. animals/
11. humans/
12. 10 not (10 and 11)
13. 9 not 12
14. back pain.mp.
15. Low Back Pain/
16. dorsalgia.mp.
17. backache.mp.
18. back ache.mp.
19. lumbago.mp.
20. Sciatica/
21. sciatica.mp.
22. coccydynia.mp.
23. coccyx.mp.
24. back disorder\*.mp.
25. spondylosis.mp.
26. (lumbar adj1 pain).mp.
27. ischialgia.mp.
28. radiculopath\*.mp.
29. 14 or 15 or 16 or 17 or 18 or 19 or 20 or 21 or 22 or 23 or 24 or 25 or 26 or 27 or 28
30. exp Narcotics/
31. exp Analgesics, Opioid/
32. morphine.mp.
33. buprenorphine.mp.
34. codeine.mp.
35. dextromoramide.mp.
36. diphenoxylate.mp.
37. dipipanone.mp.
38. dextropropoxyphene.mp.
39. propoxyphene.mp.
40. diamorphine.mp.
41. dihydrocodeine.mp.
42. alfentanil.mp.
43. fentanyl.mp.
44. remifentanil.mp.
45. meptazinol.mp.
46. methadone.mp.
47. nalbuphine.mp.

48. oxycodone.mp.
49. papaveretum.mp.
50. pentazocine.mp.
51. meperidine.mp.
52. pethidine.mp.
53. phenazocine.mp.
54. hydrocodone.mp.
55. hydromorphone.mp.
56. levorphanol.mp.
57. oxymorphone.mp.
58. butorphanol.mp.
59. dezocine.mp.
60. sufentanil.mp.
61. ketobemidone.mp.
62. Suboxone.mp.
63. Buprenorphine-naloxone.mp.
64. Hydrocodone.mp.
65. Hysingla.mp.
66. Zohydro.mp.
67. Belbuca.mp.
68. Buprenex.mp.
69. Butrans.mp.
70. Sublocade.mp.
71. Probuphine implant kit.mp.
72. Tramadol.mp.
73. Conzip.mp.
74. Ultram.mp.
75. Durela.mp.
76. Ralivia.mp.
77. Tridural.mp.
78. Zytram.mp.
79. Duramorph.mp.
80. Tapentadol.mp.
81. Tramacet.mp.
82. MS-contin.mp.
83. M-Eslon.mp.
84. Kadian.mp.
85. Hydromorph contin.mp.
86. Oxyneo.mp.
87. Duragesic patch.mp.
88. Nucynta.mp.
89. Demerol.mp.
90. Talwin.mp.
91. 30 or 31 or 32 or 33 or 34 or 35 or 36 or 37 or 38 or 39 or 40 or 41 or 42 or 43 or 44 or 45 or 46 or 47 or 48 or 49 or 50 or 51 or 52 or 53 or 54 or 55 or 56 or 57 or 58 or 59 or 60 or 61 or 62 or 63 or 64 or 65 or 66 or 67 or 68 or 69 or 70 or 71 or 72 or 73 or 74 or 75 or 76 or 77 or 78 or 79 or 80 or 81 or 82 or 83 or 84 or 85 or 86 or 87 or 88 or 89 or 90
92. 13 and 29 and 91



## Oral Non-Steroidal Anti-Inflammatory Drugs

1. randomized controlled trial.pt.
2. clinical trial.pt.
3. randomi?ed.ti,ab.
4. placebo.ti,ab.
5. dt.fs.
6. randomly.ti,ab.
7. trial.ti,ab.
8. groups.ti,ab.
9. or/1-8
10. animals/
11. humans/
12. 10 not (10 and 11)
13. 9 not 12
14. back pain.mp.
15. Low Back Pain/
16. dorsalgia.mp.
17. backache.mp.
18. back ache.mp.
19. lumbago.mp.
20. Sciatica/
21. sciatica.mp.
22. coccydynia.mp.
23. coccyx.mp.
24. back disorder\*.mp.
25. spondylosis.mp.
26. (lumbar adj1 pain).mp.
27. ischialgia.mp.
28. radiculopath\*.mp.
29. 14 or 15 or 16 or 17 or 18 or 19 or 20 or 21 or 22 or 23 or 24 or 25 or 26 or 27 or 28
30. exp Anti-Inflammatory Agents, Non-Steroidal/
31. non-steroidal antiinflammat\*.mp.
32. non-steroidal anti-inflammat\*.mp.
33. nsaid.mp.
34. exp Aspirin/ or aspirin.mp.
35. acetylsalicyl\*.mp.
36. exp Salicylic Acid/
37. carbasalate calcium.mp.
38. diflunisal.mp. or exp Diflunisal/
39. (indometacin or indomethacin).mp.
40. exp Indomethacin/
41. sulindac.mp. or exp Sulindac/
42. meloxicam.mp.
43. piroxicam.mp. or exp Piroxicam/
44. dexibuprofen.mp.
45. dexketoprofen.mp.
46. fenoprofen.mp. or exp Fenoprofen/
47. flurbiprofen.mp. or exp Flurbiprofen/

48. ibuprofen.mp. or exp Ibuprofen/
49. ketoprofen.mp. or exp Ketoprofen/
50. naproxen.mp. or exp Naproxen/
51. tiapro\*.mp.
52. metamizol.mp.
53. Dipyron.mp. or exp Dipyron/
54. phenylbutazone.mp. or exp Phenylbutazone/
55. phenazone.mp.
56. exp Antipyrine/
57. propyphenazone.mp.
58. celecoxib.mp. or exp Celecoxib/
59. etoricoxib.mp. or exp Etoricoxib/
60. nabumeton.mp.
61. parecoxib.mp.
62. exp Cyclooxygenase Inhibitors/
63. exp Cyclooxygenase 2 Inhibitors/
64. (cyclooxygenase adj2 inhibitors).mp.
65. rofecoxib.mp.
66. valdecoxib.mp.
67. lumiracoxib.mp.
68. vioxx.mp.
69. celebrex.mp.
70. bextra.mp.
71. prexige.mp.
72. arcoxia.mp.
73. etodolac.mp. or exp Etodolac/
74. floctafenine.mp.
75. exp Meclofenamic Acid/ or Meclofenamic.mp.
76. meclofenamate.mp.
77. oxaprozin.mp.
78. tenoxicam.mp.
79. tolmetin.mp. or exp Tolmetin/
80. Bufexamac.mp. or exp Bufexamac/
81. Bufexine.mp.
82. Calmaderm.mp.
83. Ekzemase.mp.
84. Solaraze.mp.
85. Pennsaid.mp.
86. Voltarol.mp.
87. Voltarene.mp.
88. Voltaren.mp.
89. Etofen\*.mp.
90. Afrolate.mp.
91. Algesalona.mp.
92. Bayro.mp.
93. Deiron.mp.
94. Flexium.mp.
95. Flogoprofen.mp.

96. Rheumon.mp.  
97. Traumalix.mp.  
98. Traumon.mp.  
99. Zenavan.mp.  
100. Felbinac.mp.  
101. Dolinac.mp.  
102. Flexfree.mp.  
103. Napageln.mp.  
104. Traxam.mp.  
105. Fentiazac.mp.  
106. Domureuma.mp.  
107. Fentiazaco.mp.  
108. Norvedan.mp.  
109. Riscalon.mp.  
110. Fepradinol.mp.  
111. Dalgen.mp.  
112. Flexidol.mp.  
113. Cocresol.mp.  
114. Randozona.mp.  
115. Reuflodol.mp.  
116. Pinazone.mp.  
117. Zepelin.mp.  
118. Flufenamic.mp.  
119. Dignodolin.mp.  
120. Lindofluid.mp.  
121. Sastridex.mp.  
122. Lunoxaprofen.mp.  
123. priaxim.mp.  
124. Flubiprofen.mp.  
125. Fenomel.mp.  
126. Ocuflen.mp.  
127. Ocuflur.mp.  
128. Cuprofen.mp.  
129. "deep relief".mp.  
130. Fenbid.mp.  
131. Motrin.mp.  
132. advil.mp.  
133. radian.mp.  
134. ralgex.mp.  
135. indocin.mp.  
136. isonixin.mp.  
137. nixyn.mp.  
138. tiloket.mp.  
139. oruvail.mp.  
140. solpaflex.mp.  
141. acular.mp.  
142. trometamol.mp.  
143. naprosyn.mp.

144. niflumic.mp.  
145. actol.mp.  
146. flunir.mp.  
147. niflactol.mp.  
148. niflugel.mp.  
149. nifluril.mp.  
150. Oxyphenbutazone.mp.  
151. Californit.mp.  
152. Diflamil.mp.  
153. Otone.mp.  
154. Tanderil.mp.  
155. Piketoprofen.mp.  
156. calmatel.mp.  
157. Triparsean.mp.  
158. Feldene.mp.  
159. Pranoprofen.mp.  
160. Oftalar.mp.  
161. Pranox.mp.  
162. Suxibuzone.mp.  
163. Danilon.mp.  
164. Flamilon.mp.  
165. Ufenamate.mp.  
166. Fenazol.mp.  
167. Flector.mp.  
168. Benzydamine.mp.  
169. exp Nabumetone/  
170. apazone.mp.  
171. dolobid.mp.  
172. clinoril.mp.  
173. cambia.mp.  
174. toradol.mp. or exp Ketorolac Tromethamine/  
175. sprix.mp.  
176. ultradol.mp.  
177. ansaid.mp.  
178. orudis.mp.  
179. aleve.mp.  
180. Anaprox.mp.  
181. daypro.mp.  
182. Tiaprofenic acid.mp.  
183. Surgam.mp.  
184. mobicox.mp.  
185. mobiflex.mp.  
186. relafen.mp.  
187. idarac.mp.  
188. mefenamic acid.mp.  
189. ponstan.mp.  
190. Azapropazone.mp.

191. 30 or 31 or 32 or 33 or 34 or 35 or 36 or 37 or 38 or 39 or 40 or 41 or 42 or 43 or 44 or 45 or 46 or 47 or 48 or 49 or 50 or 51 or 52 or 53 or 54 or 55 or 56 or 57 or 58 or 59 or 60 or 61 or 62 or 63 or 64 or 65 or 66 or 67 or 68 or 69 or 70 or 71 or 72 or 73 or 74 or 75 or 76 or 77 or 78 or 79 or 80 or 81 or 82 or 83 or 84 or 85 or 86 or 87 or 88 or 89 or 90 or 91 or 92 or 93 or 94 or 95 or 96 or 97 or 98 or 99 or 100 or 101 or 102 or 103 or 104 or 105 or 106 or 107 or 108 or 109 or 110 or 111 or 112 or 113 or 114 or 115 or 116 or 117 or 118 or 119 or 120 or 121 or 122 or 123 or 124 or 125 or 126 or 127 or 128 or 129 or 130 or 131 or 132 or 133 or 134 or 135 or 136 or 137 or 138 or 139 or 140 or 141 or 142 or 143 or 144 or 145 or 146 or 147 or 148 or 149 or 150 or 151 or 152 or 153 or 154 or 155 or 156 or 157 or 158 or 159 or 160 or 161 or 162 or 163 or 164 or 165 or 166 or 167 or 168 or 169 or 170 or 171 or 172 or 173 or 174 or 175 or 176 or 177 or 178 or 179 or 180 or 181 or 182 or 183 or 184 or 185 or 186 or 187 or 188 or 189 or 190  
192. 13 and 29 and 191

## Rubefacients

1. randomized controlled trial.pt.
2. clinical trial.pt.
3. randomi?ed.ti,ab.
4. placebo.ti,ab.
5. dt.fs.
6. randomly.ti,ab.
7. trial.ti,ab.
8. groups.ti,ab.
9. or/1-8
10. animals/
11. humans/
12. 10 not (10 and 11)
13. 9 not 12
14. back pain.mp.
15. Low Back Pain/
16. dorsalgia.mp.
17. backache.mp.
18. back ache.mp.
19. lumbago.mp.
20. Sciatica/
21. sciatica.mp.
22. coccydynia.mp.
23. coccyx.mp.
24. back disorder\*.mp.
25. spondylosis.mp.
26. (lumbar adj1 pain).mp.
27. ischialgia.mp.
28. radiculopath\*.mp.
29. 14 or 15 or 16 or 17 or 18 or 19 or 20 or 21 or 22 or 23 or 24 or 25 or 26 or 27 or 28
30. irritants.mp. or exp Irritants/ [mp=title, abstract, original title, name of substance word, subject heading word, floating sub-heading word, keyword heading word, organism supplementary concept word, protocol supplementary concept word, rare disease supplementary concept word, unique identifier, synonyms]
31. exp Capsaicin/
32. (rubefacient or counter-irritant or ammonium salicylate or radian B or benzyl nicotinate or kausalpunkt or pykaryl or rubriment or bornyl salicylate or camphor or choline salicylate or diethylamine salicylate or algesal or algoderma or algoflex or artogota or artogota or physiogestic or lloyd's cream or rheumagel or transvasin heat spray or diethyl salicylate or ethyl nicotinate or mucotherm or transvasin or PR heat spray or ethyl salicylate or glycol monosalicylate or ralgesic or salonpas or intralgin or glycol salicylate or algipan rub or menthol or methyl butetisalicylate or doloderm or methyl gentisate or methyl nicotinate or nella red oil or wintergreen or sweet birch oil or methyl salicylate or aezodent or argesic or aspellin or balmosa or bengue's balsam or chymol emollient balm or deep heat or dencorub or dermacreme or dubam or eftab or exocaine or germolene or gone balm or gordogestic or linsal or metholatum or monophytol or nasciodine or phlogont rheuma or rheumabad or rheumax or salonair or thermo-rub or nicoboxil or finalgon or ortholan or nonivamide or Warme-pflaster or picolamine or salicylate or

algiospray or reflex or propyl nicotinate or elacur or nicodan or salicylamide or isosal or salicylic or movelat or thurfyl salicylate or triethanolamine salicylate or analgesia creme or antiphlogistine or aspercreme or Ben-Gay or bexidermil or metsal or miosal or mobisyl or myoflex or progesic or royflex or sportscreme or topicrem or capsaicin or zostrix).mp. [mp=title, abstract, original title, name of substance word, subject heading word, floating sub-heading word, keyword heading word, organism supplementary concept word, protocol supplementary concept word, rare disease supplementary concept word, unique identifier, synonyms]

33. 30 or 31 or 32

34. exp Administration, topical/

35. (topical\* or cutaneous or dermal or transcutaneous or transdermal or percutaneous or skin or massage or embrocation or gel or ointment or aerosol or cream or creme or lotion or mousse or foam or liniment or spray or rub or balm or salve or emulsion or oil or patch or plaster).mp.

36. 34 or 35

37. 33 and 36

38. 13 and 29 and 37

SNRIs

1. randomized controlled trial.pt.

2. clinical trial.pt.

3. randomi?ed.ti,ab.

4. placebo.ti,ab.

5. dt.fs.

6. randomly.ti,ab.

7. trial.ti,ab.

8. groups.ti,ab.

9. or/1-8

10. animals/

11. humans/

12. 10 not (10 and 11)

13. 9 not 12

14. back pain.mp.

15. Low Back Pain/

16. dorsalgia.mp.

17. backache.mp.

18. back ache.mp.

19. lumbago.mp.

20. Sciatica/

21. sciatica.mp.

22. coccydynia.mp.

23. coccyx.mp.

24. back disorder\*.mp.

25. spondylosis.mp.

26. (lumbar adj1 pain).mp.

27. ischialgia.mp.

28. radiculopath\*.mp.

29. 14 or 15 or 16 or 17 or 18 or 19 or 20 or 21 or 22 or 23 or 24 or 25 or 26 or 27 or 28

30. SNRI.mp. or exp "Serotonin and Noradrenaline Reuptake Inhibitors"/

31. serotonin-norepinephrine reuptake inhibitor.mp.
32. cymbalta.mp.
33. savella.mp.
34. ixel.mp.
35. pristiq.mp.
36. effexor.mp.
37. desvenlafaxine.mp.
38. duloxetine.mp.
39. venlafaxine.mp.
40. milnacipran.mp.
41. reboxetine.mp.
42. edronax.mp.
43. viloxazine.mp.
44. vivalan.mp.
45. 30 or 31 or 32 or 33 or 34 or 35 or 36 or 37 or 38 or 39 or 40 or 41 or 42 or 43 or 44
46. 13 and 29 and 45



## Spinal Manipulation

1. randomized controlled trial.pt.
2. clinical trial.pt.
3. randomi?ed.ti,ab.
4. placebo.ti,ab.
5. dt.fs.
6. randomly.ti,ab.
7. trial.ti,ab.
8. groups.ti,ab.
9. or/1-8
10. animals/
11. humans/
12. 10 not (10 and 11)
13. 9 not 12
14. back pain.mp.
15. Low Back Pain/
16. dorsalgia.mp.
17. backache.mp.
18. back ache.mp.
19. lumbago.mp.
20. Sciatica/
21. sciatica.mp.
22. coccydynia.mp.
23. coccyx.mp.
24. back disorder\*.mp.
25. spondylosis.mp.
26. (lumbar adj1 pain).mp.
27. ischialgia.mp.
28. radiculopath\*.mp.
29. 14 or 15 or 16 or 17 or 18 or 19 or 20 or 21 or 22 or 23 or 24 or 25 or 26 or 27 or 28
30. exp Manipulation, Chiropractic/
31. exp Manipulation, Orthopedic/
32. exp Manipulation, Osteopathic/
33. exp Manipulation, Spinal/
34. exp Musculoskeletal Manipulations/
35. exp Chiropractic/
36. exp \*Orthopedics/
37. exp Osteopathic Medicine/
38. chiropractic.mp.
39. osteopath\*.mp.
40. (spin\* adj4 manipulat\*).tw.
41. orthopedic manipulation.mp.
42. spinal manipulation.mp.
43. (manual adj2 therap\*).mp.
44. spine manipulat\*.mp.
45. 30 or 31 or 32 or 33 or 34 or 35 or 36 or 37 or 38 or 39 or 40 or 41 or 42 or 43 or 44
46. 13 and 29 and 45

## Selective Serotonin Reuptake Inhibitors

1. randomized controlled trial.pt.
2. clinical trial.pt.
3. randomi?ed.ti,ab.
4. placebo.ti,ab.
5. dt.fs.
6. randomly.ti,ab.
7. trial.ti,ab.
8. groups.ti,ab.
9. or/1-8
10. animals/
11. humans/
12. 10 not (10 and 11)
13. 9 not 12
14. back pain.mp.
15. Low Back Pain/
16. dorsalgia.mp.
17. backache.mp.
18. back ache.mp.
19. lumbago.mp.
20. Sciatica/
21. sciatica.mp.
22. coccydynia.mp.
23. coccyx.mp.
24. back disorder\*.mp.
25. spondylosis.mp.
26. (lumbar adj1 pain).mp.
27. ischialgia.mp.
28. radiculopath\*.mp.
29. 14 or 15 or 16 or 17 or 18 or 19 or 20 or 21 or 22 or 23 or 24 or 25 or 26 or 27 or 28
30. exp Manipulation, Chiropractic/
31. exp Manipulation, Orthopedic/
32. exp Manipulation, Osteopathic/
33. exp Manipulation, Spinal/
34. exp Musculoskeletal Manipulations/
35. exp Chiropractic/
36. exp Orthopedics/
37. exp Osteopathic Medicine/
38. chiropractic.mp.
39. osteopath\*.mp.
40. (spin\* adj4 manipulat\*).tw.
41. orthopedic manipulation.mp.
42. spinal manipulation.mp.
43. physical therapy.mp.
44. exp Physical Therapy Specialty/
45. (manual adj2 therap\*).mp.
46. 30 or 31 or 32 or 33 or 34 or 35 or 36 or 37 or 38 or 39 or 40 or 41 or 42 or 43 or 44 or 45
47. 13 and 29 and 46

48. randomized controlled trial.pt.
49. clinical trial.pt.
50. randomi?ed.ti,ab.
51. placebo.ti,ab.
52. dt.fs.
53. randomly.ti,ab.
54. trial.ti,ab.
55. groups.ti,ab.
56. or/48-55
57. animals/
58. humans/
59. 57 not (57 and 58)
60. 56 not 59
61. back pain.mp.
62. Low Back Pain/
63. dorsalgia.mp.
64. backache.mp.
65. back ache.mp.
66. lumbago.mp.
67. Sciatica/
68. sciatica.mp.
69. coccydynia.mp.
70. coccyx.mp.
71. back disorder\*.mp.
72. spondylosis.mp.
73. (lumbar adj1 pain).mp.
74. ischialgia.mp.
75. radiculopath\*.mp.
76. 61 or 62 or 63 or 64 or 65 or 66 or 67 or 68 or 69 or 70 or 71 or 72 or 73 or 74 or 75
77. serotonin uptake inhibitors.mp. or exp Serotonin Uptake Inhibitors/
78. citalopram.mp. or exp Citalopram/
79. fenfluramine.mp.
80. fluoxetine.mp.
81. Fluvoxamine.mp.
82. norfenfluramine.mp.
83. paroxetine.mp.
84. sertraline.mp.
85. trazodone.mp.
86. zimeldine.mp.
87. (serotonin adj5 inhibitor\*).mp.
88. SSRI.mp.
89. (5-hydroxytryptamine adj5 inhibitor\*).mp.
90. (5-ht adj5 inhibitor\*).mp.
91. celexa.mp.
92. prozac.mp.
93. paxil.mp.
94. seroxat.mp.
95. zoloft.mp.

96. lustral.mp.

97. lexapro.mp.

98. cipralex.mp.

99. luvox.mp.

100. 77 or 78 or 79 or 80 or 81 or 82 or 83 or 84 or 85 or 86 or 87 or 88 or 89 or 90 or 91 or 92 or 93 or 94 or 95 or 96 or 97 or 98 or 99

101. 60 and 76 and 100

## Tricyclic Antidepressants

1. randomized controlled trial.pt.
2. clinical trial.pt.
3. randomi?ed.ti,ab.
4. placebo.ti,ab.
5. dt.fs.
6. randomly.ti,ab.
7. trial.ti,ab.
8. groups.ti,ab.
9. or/1-8
10. animals/
11. humans/
12. 10 not (10 and 11)
13. 9 not 12
14. back pain.mp.
15. Low Back Pain/
16. dorsalgia.mp.
17. backache.mp.
18. back ache.mp.
19. lumbago.mp.
20. Sciatica/
21. sciatica.mp.
22. coccydynia.mp.
23. coccyx.mp.
24. back disorder\*.mp.
25. spondylosis.mp.
26. (lumbar adj1 pain).mp.
27. ischialgia.mp.
28. radiculopath\*.mp.
29. 14 or 15 or 16 or 17 or 18 or 19 or 20 or 21 or 22 or 23 or 24 or 25 or 26 or 27 or 28
30. exp Antidepressive Agents, Tricyclic/
31. tricyclic antidepressants.mp.
32. tricyclic anti-depressants.mp.
33. tca.mp.
34. amitriptyline.mp. or exp Amitriptyline/
35. amoxapine.mp. or exp Amoxapine/
36. anafranil.mp.
37. elavil.mp.
38. endep.mp.
39. clomipramine.mp. or exp Clomipramine/
40. c?lorimipramine.mp.
41. clomipramine hydrochloride.mp.
42. desipramine.mp. or exp Desipramine/
43. norpramin.mp.
44. dibenzepin.mp.
45. dosulepin.mp.
46. dothiepin.mp. or exp Dothiepin/
47. doxepin.mp. or exp Doxepin/

48. florporamine.mp.
49. imipramine.mp. or exp Imipramine/
50. iprindole.mp. or exp Iprindole/
51. lofepramine.mp. or exp Lofepramine/
52. maprotiline.mp.
53. nortriptyline.mp. or exp Nortriptyline/
54. opipramol.mp.
55. pertofrane.mp.
56. prothiaden.mp.
57. protriptyline.mp. or exp Protriptyline/
58. trimipramine.mp. or exp Trimipramine/
59. tricyclic.mp.
60. adapin.mp.
61. sinequan.mp.
62. tofranil.mp.
63. feprapax.mp.
64. gamanil.mp.
65. lomont.mp.
66. pamelor.mp.
67. vivactil.mp.
68. surmontil.mp.
69. asendin.mp.
70. 30 or 31 or 32 or 33 or 34 or 35 or 36 or 37 or 38 or 39 or 40 or 41 or 42 or 43 or 44 or 45 or 46 or 47 or 48 or 49 or 50 or 51 or 52 or 53 or 54 or 55 or 56 or 57 or 58 or 59 or 60 or 61 or 62 or 63 or 64 or 65 or 66 or 67 or 68 or 69
71. 13 and 29 and 70

## Topical Non-Steroidal Anti-Inflammatory Drugs

1. randomized controlled trial.pt.
2. clinical trial.pt.
3. randomi?ed.ti,ab.
4. placebo.ti,ab.
5. dt.fs.
6. randomly.ti,ab.
7. trial.ti,ab.
8. groups.ti,ab.
9. or/1-8
10. animals/
11. humans/
12. 10 not (10 and 11)
13. 9 not 12
14. back pain.mp.
15. Low Back Pain/
16. dorsalgia.mp.
17. backache.mp.
18. back ache.mp.
19. lumbago.mp.
20. Sciatica/
21. sciatica.mp.
22. coccydynia.mp.
23. coccyx.mp.
24. back disorder\*.mp.
25. spondylosis.mp.
26. (lumbar adj1 pain).mp.
27. ischialgia.mp.
28. radiculopath\*.mp.
29. 14 or 15 or 16 or 17 or 18 or 19 or 20 or 21 or 22 or 23 or 24 or 25 or 26 or 27 or 28
30. exp Anti-Inflammatory Agents, Non-Steroidal/
31. non-steroidal antiinflammat\*.mp.
32. non-steroidal anti-inflammat\*.mp.
33. nsaid.mp.
34. exp Aspirin/ or aspirin.mp.
35. acetylsalicyl\*.mp.
36. exp Salicylic Acid/
37. carbasalate calcium.mp.
38. diflunisal.mp. or exp Diflunisal/
39. (indometacin or indomethacin).mp.
40. exp Indomethacin/
41. sulindac.mp. or exp Sulindac/
42. meloxicam.mp.
43. piroxicam.mp. or exp Piroxicam/
44. dexibuprofen.mp.
45. dexketoprofen.mp.
46. fenoprofen.mp. or exp Fenoprofen/
47. flurbiprofen.mp. or exp Flurbiprofen/

48. ibuprofen.mp. or exp Ibuprofen/
49. ketoprofen.mp. or exp Ketoprofen/
50. naproxen.mp. or exp Naproxen/
51. tiapro\*.mp.
52. metamizol.mp.
53. Dipyron.mp. or exp Dipyron/
54. phenylbutazone.mp. or exp Phenylbutazone/
55. phenazone.mp.
56. exp Antipyrine/
57. propyphenazone.mp.
58. celecoxib.mp. or exp Celecoxib/
59. etoricoxib.mp. or exp Etoricoxib/
60. nabumeton.mp.
61. parecoxib.mp.
62. exp Cyclooxygenase Inhibitors/
63. exp Cyclooxygenase 2 Inhibitors/
64. (cyclooxygenase adj2 inhibitors).mp.
65. rofecoxib.mp.
66. valdecoxib.mp.
67. lumiracoxib.mp.
68. vioxx.mp.
69. celebrex.mp.
70. bextra.mp.
71. prexige.mp.
72. arcoxia.mp.
73. etodolac.mp. or exp Etodolac/
74. floctafenine.mp.
75. exp Meclofenamic Acid/ or Meclofenamic.mp.
76. meclofenamate.mp.
77. oxaprozin.mp.
78. tenoxicam.mp.
79. tolmetin.mp. or exp Tolmetin/
80. Bufexamac.mp. or exp Bufexamac/
81. Bufexine.mp.
82. Calmaderm.mp.
83. Ekzemase.mp.
84. Solaraze.mp.
85. Pennsaid.mp.
86. Voltarol.mp.
87. Voltarene.mp.
88. Voltaren.mp.
89. Etofen\*.mp.
90. Afrolate.mp.
91. Algesalona.mp.
92. Bayro.mp.
93. Deiron.mp.
94. Flexium.mp.
95. Flogoprofen.mp.



96. Rheumon.mp.  
97. Traumalix.mp.  
98. Traumon.mp.  
99. Zenavan.mp.  
100. Felbinac.mp.  
101. Dolinac.mp.  
102. Flexfree.mp.  
103. Napageln.mp.  
104. Traxam.mp.  
105. Fentiazac.mp.  
106. Domureuma.mp.  
107. Fentiazaco.mp.  
108. Norvedan.mp.  
109. Riscalon.mp.  
110. Fepradinol.mp.  
111. Dalgen.mp.  
112. Flexidol.mp.  
113. Cocresol.mp.  
114. Randozona.mp.  
115. Reuflodol.mp.  
116. Pinazone.mp.  
117. Zepelin.mp.  
118. Flufenamic.mp.  
119. Dignodolin.mp.  
120. Lindofluid.mp.  
121. Sastridex.mp.  
122. Lunoxaprofen.mp.  
123. priaxim.mp.  
124. Flubiprofen.mp.  
125. Fenomel.mp.  
126. Ocuflen.mp.  
127. Ocuflur.mp.  
128. Cuprofen.mp.  
129. "deep relief".mp.  
130. Fenbid.mp.  
131. Motrin.mp.  
132. advil.mp.  
133. radian.mp.  
134. ralgex.mp.  
135. indocin.mp.  
136. isonixin.mp.  
137. nixyn.mp.  
138. tiloket.mp.  
139. oruvail.mp.  
140. solpaflex.mp.  
141. acular.mp.  
142. trometamol.mp.  
143. naprosyn.mp.

144. niflumic.mp.  
145. actol.mp.  
146. flunir.mp.  
147. niflactol.mp.  
148. niflugel.mp.  
149. nifluril.mp.  
150. Oxyphenbutazone.mp.  
151. Californit.mp.  
152. Diflamil.mp.  
153. Otone.mp.  
154. Tanderil.mp.  
155. Piketoprofen.mp.  
156. calmatel.mp.  
157. Triparsean.mp.  
158. Feldene.mp.  
159. Pranoprofen.mp.  
160. Oftalar.mp.  
161. Pranox.mp.  
162. Suxibuzone.mp.  
163. Danilon.mp.  
164. Flamilon.mp.  
165. Ufenamate.mp.  
166. Fenazol.mp.  
167. Flector.mp.  
168. Benzydamine.mp.  
169. exp Nabumetone/  
170. apazone.mp.  
171. dolobid.mp.  
172. clinoril.mp.  
173. cambia.mp.  
174. toradol.mp. or exp Ketorolac Tromethamine/  
175. sprix.mp.  
176. ultradol.mp.  
177. ansaid.mp.  
178. orudis.mp.  
179. aleve.mp.  
180. Anaprox.mp.  
181. daypro.mp.  
182. Tiaprofenic acid.mp.  
183. Surgam.mp.  
184. mobicox.mp.  
185. mobiflex.mp.  
186. relafen.mp.  
187. idarac.mp.  
188. mefenamic acid.mp.  
189. ponstan.mp.  
190. Azapropazone.mp.  
191. emugel.mp.

192. ibu-cream.mp.  
193. ibugel.mp.  
194. ibumousse.mp.  
195. ibuspray.mp.  
196. nurofen gel.mp.  
197. proflex.mp.  
198. ibutop.mp.  
199. indospray.mp.  
200. power gel.mp.  
201. rheuma-gel.mp.  
202. 30 or 31 or 32 or 33 or 34 or 35 or 36 or 37 or 38 or 39 or 40 or 41 or 42 or 43 or 44 or 45 or 46 or 47 or 48 or 49 or 50 or 51 or 52 or 53 or 54 or 55 or 56 or 57 or 58 or 59 or 60 or 61 or 62 or 63 or 64 or 65 or 66 or 67 or 68 or 69 or 70 or 71 or 72 or 73 or 74 or 75 or 76 or 77 or 78 or 79 or 80 or 81 or 82 or 83 or 84 or 85 or 86 or 87 or 88 or 89 or 90 or 91 or 92 or 93 or 94 or 95 or 96 or 97 or 98 or 99 or 100 or 101 or 102 or 103 or 104 or 105 or 106 or 107 or 108 or 109 or 110 or 111 or 112 or 113 or 114 or 115 or 116 or 117 or 118 or 119 or 120 or 121 or 122 or 123 or 124 or 125 or 126 or 127 or 128 or 129 or 130 or 131 or 132 or 133 or 134 or 135 or 136 or 137 or 138 or 139 or 140 or 141 or 142 or 143 or 144 or 145 or 146 or 147 or 148 or 149 or 150 or 151 or 152 or 153 or 154 or 155 or 156 or 157 or 158 or 159 or 160 or 161 or 162 or 163 or 164 or 165 or 166 or 167 or 168 or 169 or 170 or 171 or 172 or 173 or 174 or 175 or 176 or 177 or 178 or 179 or 180 or 181 or 182 or 183 or 184 or 185 or 186 or 187 or 188 or 189 or 190 or 191 or 192 or 193 or 194 or 195 or 196 or 197 or 198 or 199 or 200 or 201  
203. exp Administration, Topical/  
204. topical\*.mp.  
205. cutaneous.mp.  
206. dermal.mp.  
207. transcutaneous.mp.  
208. transdermal.mp.  
209. percutaneous.mp.  
210. skin.mp.  
211. embrocation.mp.  
212. gel.mp.  
213. ointment.mp.  
214. aerosol.mp.  
215. cream.mp.  
216. lotion.mp.  
217. mousse.mp.  
218. foam.mp.  
219. liniment.mp.  
220. spray.mp.  
221. rub.mp.  
222. balm.mp.  
223. salve.mp.  
224. emulsion.mp.  
225. oil.mp.  
226. patch.mp.  
227. plaster.mp.  
228. 203 or 204 or 205 or 206 or 207 or 208 or 209 or 210 or 211 or 212 or 213 or 214 or 215 or 216 or 217 or 218 or 219 or 220 or 221 or 222 or 223 or 224 or 225 or 226 or 227

229. 202 and 228

230. 13 and 29 and 229

## EMBASE Searches

Acetaminophen

1. exp clinical trial/
2. randomi?ed.ti,ab.
3. placebo.ti,ab.
4. dt.fs.
5. randomly.ti,ab.
6. trial.ti,ab.
7. groups.ti,ab.
8. or/1-7
9. animal/
10. human/
11. 9 not (9 and 10)
12. 8 not 11
13. back ache.mp. or exp backache/
14. backache.mp.
15. exp low back pain/
16. back pain.mp.
17. lumbago.mp.
18. sciatica/
19. sciatica.mp.
20. coccydynia.mp.
21. coccyx.mp.
22. back disorder\*.mp.
23. spondylosis.mp.
24. (lumbar adj1 pain).mp.
25. dorsalgia.mp.
26. ischialgia.mp.
27. radiculopath\*.mp.
28. 13 or 14 or 15 or 16 or 17 or 18 or 19 or 20 or 21 or 22 or 23 or 24 or 25 or 26 or 27
29. Acetaminophen.mp. or exp \*Acetaminophen/
30. (Paracetamol or Panadol or Tylenol or abenol or aceta or actimin or anacin or apacet or acephen or acamol or acetalgin or adol or alvedon or apiretal or atamel or atasol or benuron or biogestic or buscapina or banesin or calpol or captin or cemolOR cetaphen or coldexOR cotibin or crocin or dafalgan or daleron or depon or dexamol or dolex or dolgesic or doliprane or dolorol or dolprone or dapa or dolo or datril or duatrol or efferalgan or enelfa or europain or febrectal or febricet or febridol or fensum or feverall or fibi or gelocatil or gripin or genapap or genebs or hedex or hedanol or herron or influbene or kafa or kitadol or lekadolOR lupocet or lemsip or liquiprin or pyrigestic or mexalen or milidon or minoset or napa or neopap or novo-gestic or oraphen-pd or pacol or pamol or parol or panado or panama or panodil or pharbetol or paracet or paracitol or paralen or paramed or paramol or perdolan or perfalgan or pinex or pyrenol or plicet or panadrex or paratabs or paralgin or phenaphen or revanin or rokamol or rubophen or redutemp or scanol or suppap or tachipirin or tachipirina or tafirol or tapsin or termalgin or tempru or thomapyrin or tipol or treuphadol or Triaminic or tamenOR tapanol or uphamol or vermidon or vitamol or valorin or xumadol or zolben or midol or mapap or ofirmev).ti,ab,kw.
31. 29 or 30
32. 12 and 28 and 31

## Acupuncture

1. acupunct\*.mp.
2. acupressure/
3. acupressure.mp.
4. acupoint\*.mp.
5. exp acupuncture analgesia/
6. acupuncture/
7. exp electroacupuncture/ or electroacupunct\*.mp.
8. electro-acupunct\*.mp.
9. 1 or 2 or 3 or 4 or 5 or 6 or 7 or 8
10. back pain.mp. or exp backache/
11. dorsalgia.mp.
12. exp low back pain/
13. lumbago.mp.
14. back ache.mp.
15. backache.mp.
16. coccydynia.mp.
17. (lumbar adj1 pain).mp. [mp=title, abstract, heading word, drug trade name, original title, device manufacturer, drug manufacturer, device trade name, keyword, floating subheading word, candidate term word]
18. exp clinical trial/
19. randomi?ed.ti,ab.
20. placebo.ti,ab.
21. dt.fs.
22. randomly.ti,ab.
23. trial.ti,ab.
24. groups.ti,ab.
25. or/18-24
26. animal/
27. human/
28. 26 not (26 and 27)
29. 25 not 28
30. 10 or 11 or 12 or 13 or 14 or 15 or 16 or 17
31. 9 and 29 and 30
32. 10 or 11 or 12 or 13 or 14 or 15 or 16 or 17
33. 9 and 29 and 32

## Anticonvulsants

1. exp clinical trial/
2. randomi?ed.ti,ab.
3. placebo.ti,ab.
4. dt.fs.
5. randomly.ti,ab.
6. trial.ti,ab.
7. groups.ti,ab.
8. or/1-7
9. animal/
10. human/
11. 9 not (9 and 10)
12. 8 not 11
13. back ache.mp. or exp backache/
14. backache.mp.
15. exp low back pain/
16. back pain.mp.
17. lumbago.mp.
18. sciatica/
19. sciatica.mp.
20. coccydynia.mp.
21. coccyx.mp.
22. back disorder\*.mp.
23. spondylosis.mp.
24. (lumbar adj1 pain).mp.
25. dorsalgia.mp.
26. ischialgia.mp.
27. radiculopath\*.mp.
28. 13 or 14 or 15 or 16 or 17 or 18 or 19 or 20 or 21 or 22 or 23 or 24 or 25 or 26 or 27
29. anticonvulsant.ab,ti,kw. or exp \*Anticonvulsants/
30. gabapentin.ab,ti,kw. or exp \*Gabapentin/
31. neurontin.mp.
32. pregabalin.ti,ab,kw. or exp \*Pregabalin/
33. lyrica.mp.
34. 29 or 30 or 31 or 32 or 33
35. 12 and 28 and 34

## Cannabinoids

1. exp clinical trial/
2. randomi?ed.ti,ab.
3. placebo.ti,ab.
4. dt.fs.
5. randomly.ti,ab.
6. trial.ti,ab.
7. groups.ti,ab.
8. or/1-7
9. animal/
10. human/
11. 9 not (9 and 10)
12. 8 not 11
13. back ache.mp. or exp backache/
14. backache.mp.
15. exp low back pain/
16. back pain.mp.
17. lumbago.mp.
18. sciatica/
19. sciatica.mp.
20. coccydynia.mp.
21. coccyx.mp.
22. back disorder\*.mp.
23. spondylosis.mp.
24. (lumbar adj1 pain).mp.
25. dorsalgia.mp.
26. ischialgia.mp.
27. radiculopath\*.mp.
28. 13 or 14 or 15 or 16 or 17 or 18 or 19 or 20 or 21 or 22 or 23 or 24 or 25 or 26 or 27
29. Cannabis.ab,ti,kw. or exp Cannabis/
30. cannabinoid.ab,ti,kw. or exp Cannabinoids/
31. (marijuana or ganka or hashish or marihuana or bhang or dronabinol or marinol or nabilone or cesamet or dexanabinol or tetrahydrocannabinol-cannabidiol or sativex or tetrahydrocannabinol or epidiolex or shesha or suma or vingory or banji or charas or dagga or esrar or ganja or hemp or idrasil or kif or kief or machona or anascha or cannador).mp. [mp=title, abstract, heading word, drug trade name, original title, device manufacturer, drug manufacturer, device trade name, keyword, floating subheading word, candidate term word]
32. 29 or 30 or 31
33. 12 and 28 and 32



## Corticosteroid Injections

1. exp clinical trial/
2. randomi?ed.ti,ab.
3. placebo.ti,ab.
4. dt.fs.
5. randomly.ti,ab.
6. trial.ti,ab.
7. groups.ti,ab.
8. or/1-7
9. animal/
10. human/
11. 9 not (9 and 10)
12. 8 not 11
13. back ache.mp. or exp backache/
14. backache.mp.
15. exp low back pain/
16. back pain.mp.
17. lumbago.mp.
18. sciatica/
19. sciatica.mp.
20. coccydynia.mp.
21. coccyx.mp.
22. back disorder\*.mp.
23. spondylosis.mp.
24. (lumbar adj1 pain).mp.
25. dorsalgia.mp.
26. ischialgia.mp.
27. radiculopath\*.mp.
28. 13 or 14 or 15 or 16 or 17 or 18 or 19 or 20 or 21 or 22 or 23 or 24 or 25 or 26 or 27
29. exp \*Injections/
30. steroid.ti,ab,kw.
31. corticosteroid.ab,ti,kw.
32. 29 or 30 or 31
33. 12 and 28 and 32

## Exercise

1. exp clinical trial/
2. randomi?ed.ti,ab.
3. placebo.ti,ab.
4. dt.fs.
5. randomly.ti,ab.
6. trial.ti,ab.
7. groups.ti,ab.
8. or/1-7
9. animal/
10. human/
11. 9 not (9 and 10)
12. 8 not 11
13. back ache.mp. or exp backache/
14. backache.mp.
15. exp low back pain/
16. back pain.mp.
17. lumbago.mp.
18. sciatica/
19. sciatica.mp.
20. coccydynia.mp.
21. coccyx.mp.
22. back disorder\*.mp.
23. spondylosis.mp.
24. (lumbar adj1 pain).mp.
25. dorsalgia.mp.
26. ischialgia.mp.
27. radiculopath\*.mp.
28. 13 or 14 or 15 or 16 or 17 or 18 or 19 or 20 or 21 or 22 or 23 or 24 or 25 or 26 or 27
29. exp \*Exercise Movement Techniques/
30. exp \*Exercise Therapy/
31. exerci\$.ab. /freq=2
32. exp \*Physical Fitness/
33. (physical\* adj2 endur\*).mp.
34. ((strength\* or isometric\* or isotonic\* or isokinetic\* or aerobic\* or endurance or weight\*) adj5 (exercis\* or train\*)).tw.
35. physiotherap\*.ab. /freq=2
36. kinesiotherap\*.ti,ab,kw.
37. \*rehabilitation/ or \*occupational therapy/ or \*recreation therapy/
38. "physical activity".ab. /freq=2 or exp \*Exercise/
39. "muscle strength\*".ti,ab,kw.
40. (tai ji or tai chi).ti,ab,kw.
41. exp \*yoga/
42. yoga.ab. /freq=2
43. 29 or 30 or 31 or 32 or 33 or 34 or 35 or 36 or 37 or 38 or 39 or 40 or 41 or 42
44. 12 and 28 and 43

## Muscle Relaxants

1. exp clinical trial/
2. randomi?ed.ti,ab.
3. placebo.ti,ab.
4. dt.fs.
5. randomly.ti,ab.
6. trial.ti,ab.
7. groups.ti,ab.
8. or/1-7
9. animal/
10. human/
11. 9 not (9 and 10)
12. 8 not 11
13. back ache.mp. or exp backache/
14. backache.mp.
15. exp low back pain/
16. back pain.mp.
17. lumbago.mp.
18. sciatica/
19. sciatica.mp.
20. coccydynia.mp.
21. coccyx.mp.
22. back disorder\*.mp.
23. spondylosis.mp.
24. (lumbar adj1 pain).mp.
25. dorsalgia.mp.
26. ischialgia.mp.
27. radiculopath\*.mp.
28. 13 or 14 or 15 or 16 or 17 or 18 or 19 or 20 or 21 or 22 or 23 or 24 or 25 or 26 or 27
29. Muscle Relaxants/
30. (cyclobenzaprine or amrix or fexmid or flexeril or baclofen or gablofen or lioresal or ozobax or methocarbamol or Robaxin or orphenadrine or norflex or disipal or drinexin or epiflex or lysantin or mefamina).ab,ti,kw.
31. 29 or 30
32. 12 and 28 and 31

## Opioids

1. exp clinical trial/
2. randomi?ed.ti,ab.
3. placebo.ti,ab.
4. dt.fs.
5. randomly.ti,ab.
6. trial.ti,ab.
7. groups.ti,ab.
8. or/1-7
9. animal/
10. human/
11. 9 not (9 and 10)
12. 8 not 11
13. back ache.mp. or exp backache/
14. backache.mp.
15. exp low back pain/
16. back pain.mp.
17. lumbago.mp.
18. sciatica/
19. sciatica.mp.
20. coccydynia.mp.
21. coccyx.mp.
22. back disorder\*.mp.
23. spondylosis.mp.
24. (lumbar adj1 pain).mp.
25. dorsalgia.mp.
26. ischialgia.mp.
27. radiculopath\*.mp.
28. 13 or 14 or 15 or 16 or 17 or 18 or 19 or 20 or 21 or 22 or 23 or 24 or 25 or 26 or 27
29. (morphine or buprenorphine or codeine or dextromoramide or diphenoxylate or dipipanone or dextropropoxyphene or propoxyphene or diamorphine or dihydrocodeine or alfentanil or fentanyl or remifentanil or meptazinol or methadone or nalbuphine or oxycodone or papaveretum or pentazocine or meperidine or pethidine or phenazocine or hydrocodone or hydromorphone or levorphanol or oxymorphone or butorphanol or dezocine or sufentanil or ketobemidone or Suboxone or Buprenorphine-naloxone or Hydrocodone or Hysingla or Zohydro or Belbuca or Buprenex or Butrans or Sublocade or Probuphine implant kit or Tramadol or Conzip or Ultram or Durela or Ralivia or Tridural or Zytram or Duramorph or Tapentadol or Tramacet or MS-contin or M-Eslon or Kadian or Hydromorph contin or Oxyneo or Duragesic patch or Nucynta or Demerol or Talwin).ti,ab,kw.
30. exp \*narcotic analgesic agent/
31. narcotic.ti. or narcotic.ab. /freq=2
32. or/29-31
33. 12 and 28 and 32

## Oral Non-Steroidal Anti-Inflammatory Drugs

1. exp clinical trial/
2. randomi?ed.ti,ab.
3. placebo.ti,ab.
4. dt.fs.
5. randomly.ti,ab.
6. trial.ti,ab.
7. groups.ti,ab.
8. or/1-7
9. animal/
10. human/
11. 9 not (9 and 10)
12. 8 not 11
13. back ache.mp. or exp backache/
14. backache.mp.
15. exp low back pain/
16. back pain.mp.
17. lumbago.mp.
18. sciatica/
19. sciatica.mp.
20. coccydynia.mp.
21. coccyx.mp.
22. back disorder\*.mp.
23. spondylosis.mp.
24. (lumbar adj1 pain).mp.
25. dorsalgia.mp.
26. ischialgia.mp.
27. radiculopath\*.mp.
28. 13 or 14 or 15 or 16 or 17 or 18 or 19 or 20 or 21 or 22 or 23 or 24 or 25 or 26 or 27
29. non-steroidal antiinflammat\*.mp.
30. (nsaid or indometacin or indomethacin or meloxicam or dexibuprofen or dexketoprofen or tiapro\* or metamizol or phenazone or propyphenazone or nabumeton or parecoxib or rofecoxib or valdecoxib or lumiracoxib or vioxx or Celebrex or bextra or prexige or arcoxia or floctafenine or meclofenamate or oxaprozin or tenoxicam or Bufexine or Calmaderm or Ekzemase or Solaraze or Pennsaid or Voltarol or Voltarene or Voltaren or Etofen\* or Algesalona or Bayro or Deiron or Flexium or Flogoprofen or Rheumon or Traumalix or Traumon or Zenavan or Felbinac or Dolinac or Flexfree or Napageln or Traxam or Fentiazac or Domureuma or Fentiazaco or Norvedan or Riscalon or Fepradinol or Dalgen or Flexidol or Cocresol or Randozona or Reuflodol or Pinazone or Zepelin or Flufenamic or Dignodolin or Lindofluid or Sastridex or Lunoxaprofen or priaxim or Flubiprofen or Fenomel or Ocuflen or Ocuflur or Cuprofen or Fenbid or Motrin or advil or radian or ralgesx or Indocin or isonixin or nixyn or tiloket or oruvail or solpaflex or acular or trometamol or Naprosyn or niflumic or actol or flunir or niflactol or niflugel or nifluril or Oxyphenbutazone or Californit or Diflamil or Otone or Tanderil or Piketoprofen or calmatel or Triparsean or Feldene or Pranoprofen or Oftalar or Pranox or Suxibuzone or Danilon or Flamilon or Ufenamate or Fenazol or Flector or Benzydamine or apazone or dolobid or clinoril or cambia or sprix or ultradol or ansaid or orudis or aleve or Anaprox or daypro or Surgam or mobicox or mobiflex or Relafen or idarac or mefenamic acid or ponstan or Azapropazone or aspirin).ti,ab,kw.
31. exp \*nonsteroid antiinflammatory agent/
32. exp \*acetylsalicylic acid/

33. exp \*salicylic acid/
34. diflunisal.ab,ti,kw. or exp \*diflunisal/
35. exp \*indomethacin/
36. sulindac.ab,ti,kw. or exp \*sulindac/
37. exp \*piroxicam/ or piroxicam.ab,ti,kw.
38. exp \*fenoprofen/ or fenoprofen.ab,ti,kw.
39. flurbiprofen.ab,ti,kw. or exp \*flurbiprofen/
40. exp \*ibuprofen/
41. ketoprofen.ab,ti,kw. or exp \*ketoprofen/ [mp=title, abstract, heading word, drug trade name, original title, device manufacturer, drug manufacturer, device trade name, keyword, floating subheading word, candidate term word]
42. exp \*naproxen/ or naproxen.ab,ti,kw.
43. exp \*dipyrrone/ or Dipyrrone.ab,ti,kw.
44. exp \*phenylbutazone/ or phenylbutazone.ab,ti,kw.
45. exp \*celecoxib/
46. etoricoxib.ab,ti,kw. or exp \*etoricoxib/
47. exp \*cyclooxygenase 2 inhibitor/
48. etodolac.ab,ti,kw. or exp \*etodolac/
49. exp \*meclofenamic acid/ or Meclofenamic.ab,ti,kw.
50. tolmetin.ab,ti,kw. or exp \*tolmetin/
51. bufexamac.ab,ti,kw. or exp \*bufexamac/
52. exp \*nabumetone/
53. toradol.ab,ti,kw. or exp \*ketorolac trometamol/
54. 29 or 30 or 31 or 32 or 33 or 34 or 35 or 36 or 37 or 38 or 39 or 40 or 41 or 42 or 43 or 44 or 45 or 46 or 47 or 48 or 49 or 50 or 51 or 52 or 53
55. 12 and 28 and 54

## Rubefacients

1. exp clinical trial/
2. randomi?ed.ti,ab.
3. placebo.ti,ab.
4. dt.fs.
5. randomly.ti,ab.
6. trial.ti,ab.
7. groups.ti,ab.
8. or/1-7
9. animal/
10. human/
11. 9 not (9 and 10)
12. 8 not 11
13. back ache.mp. or exp backache/
14. backache.mp.
15. exp low back pain/
16. back pain.mp.
17. lumbago.mp.
18. sciatica/
19. sciatica.mp.
20. coccydynia.mp.
21. coccyx.mp.
22. back disorder\*.mp.
23. spondylosis.mp.
24. (lumbar adj1 pain).mp.
25. dorsalgia.mp.
26. ischialgia.mp.
27. radiculopath\*.mp.
28. 13 or 14 or 15 or 16 or 17 or 18 or 19 or 20 or 21 or 22 or 23 or 24 or 25 or 26 or 27
29. irritants.mp. or exp Irritants/ [mp=title, abstract, heading word, drug trade name, original title, device manufacturer, drug manufacturer, device trade name, keyword, floating subheading word, candidate term word]
30. exp Capsaicin/
31. (rubefacient or counter-irritant or ammonium salicylate or radian B or benzyl nicotinate or kausalpunkt or pykaryl or rubriment or bornyl salicylate or camphor or choline salicylate or diethylamine salicylate or algesal or algoderm or algoflex or artogota or artogota or physiogestic or lloyd's cream or rheumagel or transvasin heat spray or diethyl salicylate or ethyl nicotinate or mucotherm or transvasin or PR heat spray or ethyl salicylate or glycol monosalicylate or ralnex or salonpas or intralgin or glycol salicylate or algipan rub or menthol or methyl butetisalicylate or doloderm or methyl gentisate or methyl nicotinate or nella red oil or wintergreen or sweet birch oil or methyl salicylate or aezodent or argesic or aspellin or balsosa or bengue's balsam or chymol emollient balm or deep heat or dencorub or dermacreme or dubam or eftab or exocaine or germolene or gone balm or gordogestic or linsal or metholatium or monophytol or nasciodine or phlogont rheuma or rheumabad or rheumax or salonair or thermo-rub or nicoboxil or finalgon or ortholan or nonivamide or Warme-pflaster or picolamine or salicylate or algiospray or reflex or propyl nicotinate or elacur or nicodan or salicylamide or isosal or salicylic or movelat or thurfyl salicylate or triethanolamine salicylate or analgesia creme or antiphlogistine or aspercreme or Ben-Gay or bexidermil or metsal or miosal or mobisyl or myoflex or progesic or royflex or sportscreme or topicrem or capsaicin or zostrix).mp. [mp=title, abstract, heading

word, drug trade name, original title, device manufacturer, drug manufacturer, device trade name, keyword, floating subheading word, candidate term word]

32. 29 or 30 or 31

33. exp Administration, topical/

34. (topical\* or cutaneous or dermal or transcutaneous or transdermal or percutaneous or skin or massage or embrocation or gel or ointment or aerosol or cream or creme or lotion or mousse or foam or liniment or spray or rub or balm or salve or emulsion or oil or patch or plaster).mp.

35. 33 or 34

36. 32 and 35

37. 12 and 28 and 36



## Serotonin Norepinephrine Reuptake Inhibitors

1. exp clinical trial/
2. randomi?ed.ti,ab.
3. placebo.ti,ab.
4. dt.fs.
5. randomly.ti,ab.
6. trial.ti,ab.
7. groups.ti,ab.
8. or/1-7
9. animal/
10. human/
11. 9 not (9 and 10)
12. 8 not 11
13. back ache.mp. or exp backache/
14. backache.mp.
15. exp low back pain/
16. back pain.mp.
17. lumbago.mp.
18. sciatica/
19. sciatica.mp.
20. coccydynia.mp.
21. coccyx.mp.
22. back disorder\*.mp.
23. spondylosis.mp.
24. (lumbar adj1 pain).mp.
25. dorsalgia.mp.
26. ischialgia.mp.
27. radiculopath\*.mp.
28. 13 or 14 or 15 or 16 or 17 or 18 or 19 or 20 or 21 or 22 or 23 or 24 or 25 or 26 or 27
29. SNRI.ti,ab,kw.
30. serotonin-norepinephrine reuptake inhibitor.ti,ab,kw.
31. (cymbalta or savella or ixel or pristin or effexor or desvenlafaxine or duloxetine or venlafaxine or milnacipran or reboxetine or edronax or viloxazine or vivalan).mp. [mp=title, abstract, heading word, drug trade name, original title, device manufacturer, drug manufacturer, device trade name, keyword, floating subheading word, candidate term word]
32. 29 or 30 or 31
33. 12 and 28 and 32

## Spinal Manipulation

1. exp clinical trial/
2. randomi?ed.ti,ab.
3. placebo.ti,ab.
4. dt.fs.
5. randomly.ti,ab.
6. trial.ti,ab.
7. groups.ti,ab.
8. or/1-7
9. animal/
10. human/
11. 9 not (9 and 10)
12. 8 not 11
13. back ache.mp. or exp backache/
14. backache.mp.
15. exp low back pain/
16. back pain.mp.
17. lumbago.mp.
18. sciatica/
19. sciatica.mp.
20. coccydynia.mp.
21. coccyx.mp.
22. back disorder\*.mp.
23. spondylosis.mp.
24. (lumbar adj1 pain).mp.
25. dorsalgia.mp.
26. ischialgia.mp.
27. radiculopath\*.mp.
28. 13 or 14 or 15 or 16 or 17 or 18 or 19 or 20 or 21 or 22 or 23 or 24 or 25 or 26 or 27
29. exp Manipulation, Chiropractic/
30. exp Manipulation, Orthopedic/
31. exp Manipulation, Osteopathic/
32. exp Manipulation, Spinal/
33. exp Musculoskeletal Manipulations/
34. exp Chiropractic/
35. exp Orthopedics/
36. exp Osteopathic Medicine/
37. chiropractic.mp.
38. osteopath\*.mp.
39. orthopedic manipulation.mp.
40. spinal manipulation.mp.
41. physical therapy.mp.
42. exp Physical Therapy Specialty/
43. (manual adj2 therap\*).mp.
44. 29 or 30 or 31 or 32 or 33 or 34 or 35 or 36 or 37 or 38 or 39 or 40 or 41 or 42 or 43
45. 12 and 28 and 44

## Selective Serotonin Reuptake Inhibitors

1. exp clinical trial/
2. randomi?ed.ti,ab.
3. placebo.ti,ab.
4. dt.fs.
5. randomly.ti,ab.
6. trial.ti,ab.
7. groups.ti,ab.
8. or/1-7
9. animal/
10. human/
11. 9 not (9 and 10)
12. 8 not 11
13. back ache.mp. or exp backache/
14. backache.mp.
15. exp low back pain/
16. back pain.mp.
17. lumbago.mp.
18. sciatica/
19. sciatica.mp.
20. coccydynia.mp.
21. coccyx.mp.
22. back disorder\*.mp.
23. spondylosis.mp.
24. (lumbar adj1 pain).mp.
25. dorsalgia.mp.
26. ischialgia.mp.
27. radiculopath\*.mp.
28. 13 or 14 or 15 or 16 or 17 or 18 or 19 or 20 or 21 or 22 or 23 or 24 or 25 or 26 or 27
29. exp Serotonin Uptake Inhibitors/
30. (fenfluramine or fluoxetine or Fluvoxamine or norfenfluramine or paroxetine or sertraline or trazodone or zimeldine or SSRI\* or celexa or prozac or paxil or seroxat or zoloft or lustral or lexapro or escitalopram or cipralex or luvox).ab,ti,kw.
31. 29 or 30
32. 12 and 28 and 31

## Tricyclic Antidepressants

1. exp clinical trial/
2. randomi?ed.ti,ab.
3. placebo.ti,ab.
4. dt.fs.
5. randomly.ti,ab.
6. trial.ti,ab.
7. groups.ti,ab.
8. or/1-7
9. animal/
10. human/
11. 9 not (9 and 10)
12. 8 not 11
13. back ache.mp. or exp backache/
14. backache.mp.
15. exp low back pain/
16. back pain.mp.
17. lumbago.mp.
18. sciatica/
19. sciatica.mp.
20. coccydynia.mp.
21. coccyx.mp.
22. back disorder\*.mp.
23. spondylosis.mp.
24. (lumbar adj1 pain).mp.
25. dorsalgia.mp.
26. ischialgia.mp.
27. radiculopath\*.mp.
28. 13 or 14 or 15 or 16 or 17 or 18 or 19 or 20 or 21 or 22 or 23 or 24 or 25 or 26 or 27
29. exp Antidepressive Agents, Tricyclic/
30. tricyclic antidepressants.mp.
31. tricyclic anti-depressants.mp.
32. tca.mp.
33. amitriptyline.mp. or exp Amitriptyline/
34. amoxapine.mp. or exp Amoxapine/
35. anafranil.mp.
36. elavil.mp.
37. endep.mp.
38. clomipramine.mp. or exp Clomipramine/
39. c?lorimipramine.mp.
40. clomipramine hydrochloride.mp.
41. desipramine.mp. or exp Desipramine/
42. norpramin.mp.
43. dibenzepin.mp.
44. dosulepin.mp.
45. dothiepin.mp. or exp Dothiepin/
46. doxepin.mp. or exp Doxepin/
47. florpipramine.mp.

48. imipramine.mp. or exp Imipramine/
49. iprindole.mp. or exp Iprindole/
50. lofepramine.mp. or exp Lofepramine/
51. maprotiline.mp.
52. nortriptyline.mp. or exp Nortriptyline/
53. opipramol.mp.
54. pertofrane.mp.
55. prothiaden.mp.
56. protriptyline.mp. or exp Protriptyline/
57. trimipramine.mp. or exp Trimipramine/
58. tricyclic\*.mp.
59. adapin.mp.
60. sinequan.mp.
61. tofranil.mp.
62. feprapax.mp.
63. gamanil.mp.
64. lomont.mp.
65. pamelor.mp.
66. vivactil.mp.
67. surmontil.mp.
68. asendin.mp.
69. 29 or 30 or 31 or 32 or 33 or 34 or 35 or 36 or 37 or 38 or 39 or 40 or 41 or 42 or 43 or 44 or 45 or 46 or 47 or 48 or 49 or 50 or 51 or 52 or 53 or 54 or 55 or 56 or 57 or 58 or 59 or 60 or 61 or 62 or 63 or 64 or 65 or 66 or 67 or 68
70. 12 and 28 and 69

## Topical Non-Steroidal Anti-Inflammatory Drugs

1. exp clinical trial/
2. randomi?ed.ti,ab.
3. placebo.ti,ab.
4. dt.fs.
5. randomly.ti,ab.
6. trial.ti,ab.
7. groups.ti,ab.
8. or/1-7
9. animal/
10. human/
11. 9 not (9 and 10)
12. 8 not 11
13. back ache.mp. or exp backache/
14. backache.mp.
15. exp low back pain/
16. back pain.mp.
17. lumbago.mp.
18. sciatica/
19. sciatica.mp.
20. coccydynia.mp.
21. coccyx.mp.
22. back disorder\*.mp.
23. spondylosis.mp.
24. (lumbar adj1 pain).mp.
25. dorsalgia.mp.
26. ischialgia.mp.
27. radiculopath\*.mp.
28. 13 or 14 or 15 or 16 or 17 or 18 or 19 or 20 or 21 or 22 or 23 or 24 or 25 or 26 or 27
29. (bufexamac or bufexine or calmaderm or ekzemase or diclofenac or solaraze or pennsaid or voltarol or emugel or voltarene or voltarol or optha or voltaren or etofenamate or afrolate or algesalona or bayro or deiron or etofen or flexium or flogoprofen or rheuma gel or rheumon or traumalix or traumon or zenavan or felbinac or dolinac or flexfree or napageln or target or traxam or fentiazac or domureuma or fentiazaco or norvedan or riscalon or fepradinol or dalgen or flexidol or cocresol or rangozona or reuflodol or pinazone or zepelin or flufenamic or dignodolin or rheuma or lindofluid or sastridex or lunoxaprofen or priaxim or flubiprofen or fenomel or ocufen or ocuflur or Trans Act LAT or tulip or ibuprofen or cuprofen or deep relief or fenbid or ibu cream or ibugel or ibuleve or ibumousse or ibuspray or nurofen gel or proflex or motrin or advil or radian or ralgesic or ibutop or indomethacin or indocin or indospray or isonixin or nixyn or ketoprofen or tiloket or oruvail or powergel or solpaflex or ketorolac or acular or trometamol or meclofenamic or naproxen or naprosyn or niflumic or actol or flunir or niflactol topico or niflugel or nifluril or oxyphenbutazone or californit or diflamil or otone or tanderil or piketoprofen or calmatel or triparsean or piroxicam or feldene or pranoprofen or oftalar or pranox or suxibuzone or danilon or flamilon or ufenamate or fenazol or flector or benzydamine).ti,ab,kw.
30. exp \*nonsteroid antiinflammatory agent/
31. 29 or 30
32. exp topical drug administration/

33. (topical\* or cutaneous or dermal or transcutaneous or transdermal or percutaneous or skin or massage or embrocation or gel or ointment or aerosol or cream or lotion or mouse or foam or liniment or spray or rub or balm or salve or emulsion or oil or patch or plaster).mp.

34. 32 or 33

35. 31 and 34

36. 12 and 28 and 35

## PRISMA Figures

Figure 1: PRISMA study flow: Acetaminophen

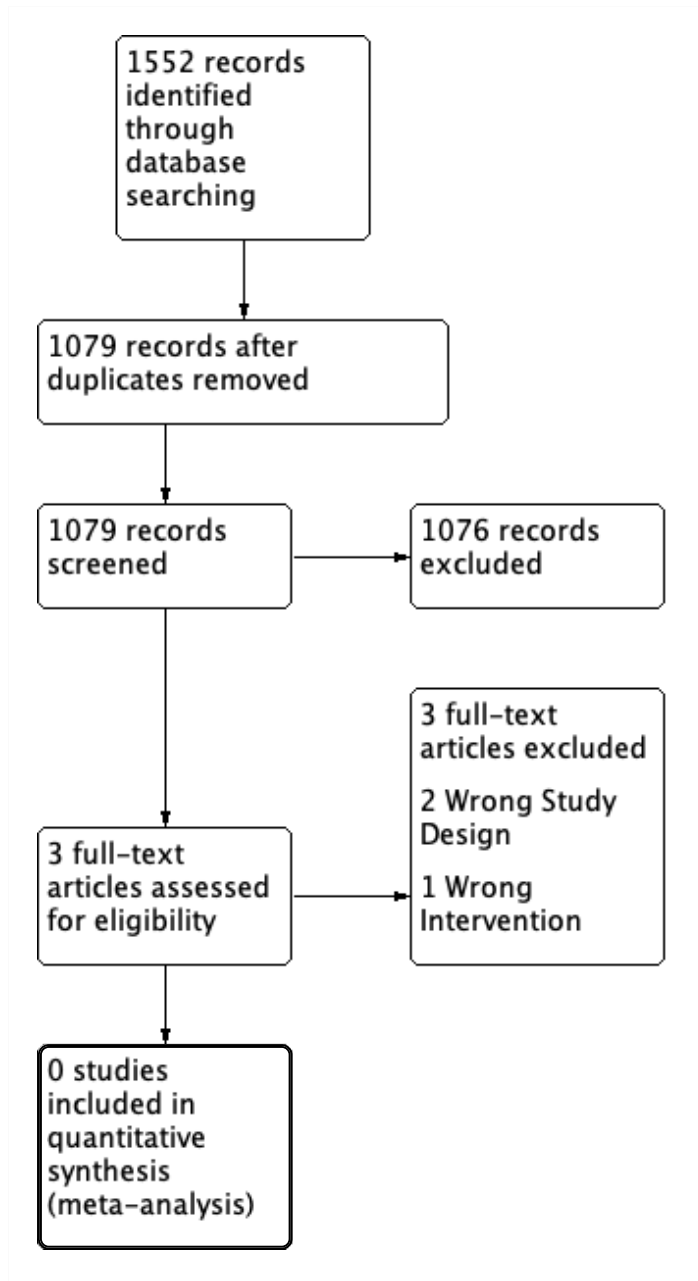



**Figure 2: PRISMA study flow: Acupuncture**

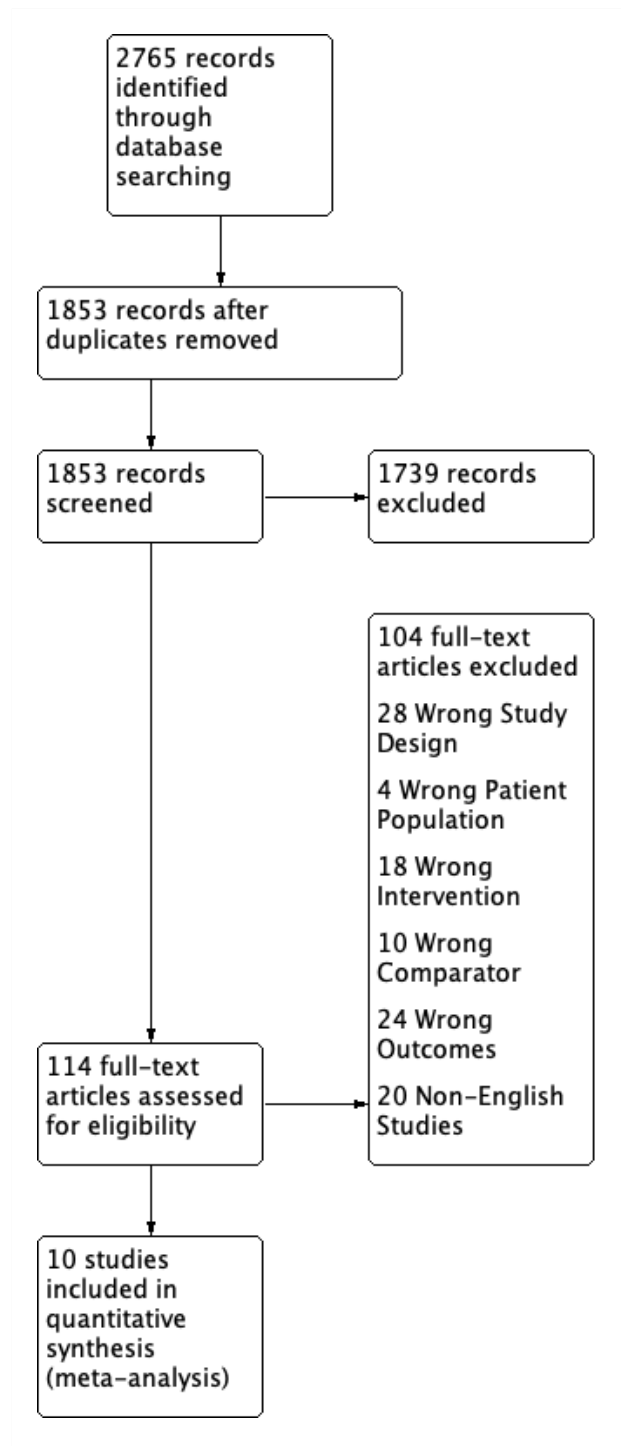

**Figure 3: PRISMA study flow: Anticonvulsants**

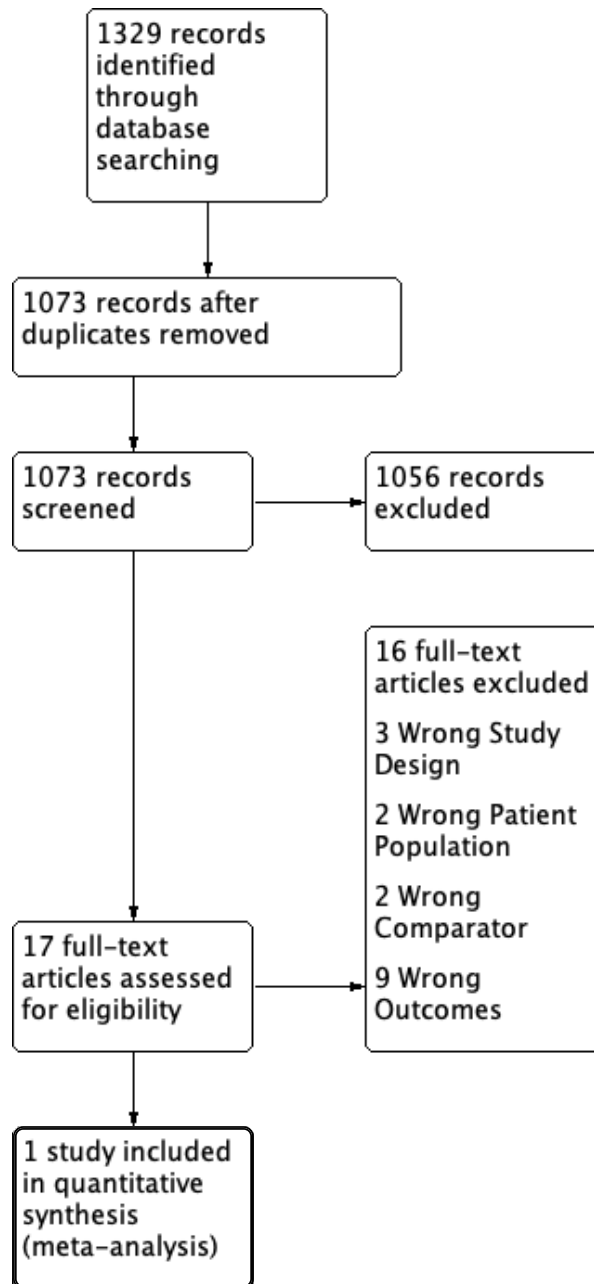

Figure 4: PRISMA study flow: Cannabinoids

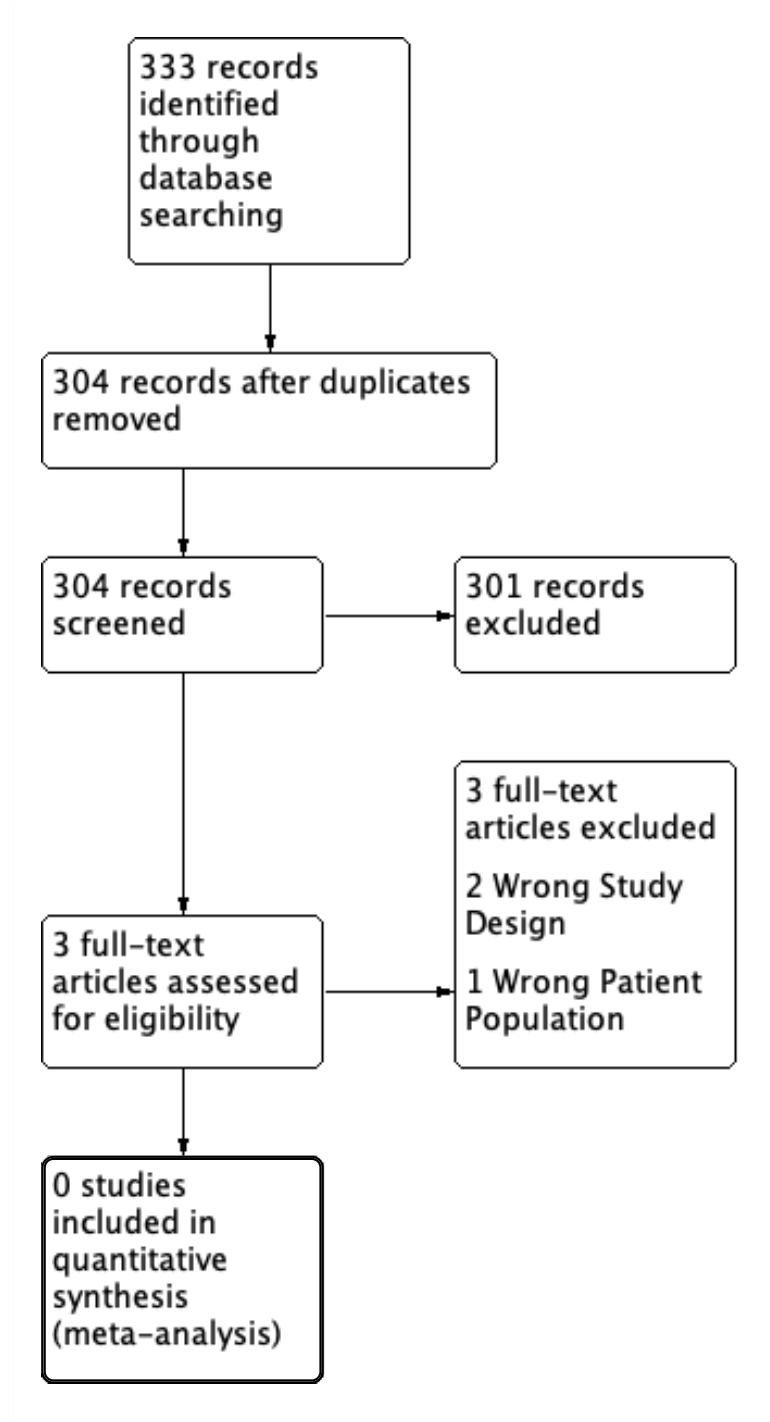

Figure 5: PRISMA study flow: Corticosteroid Injections

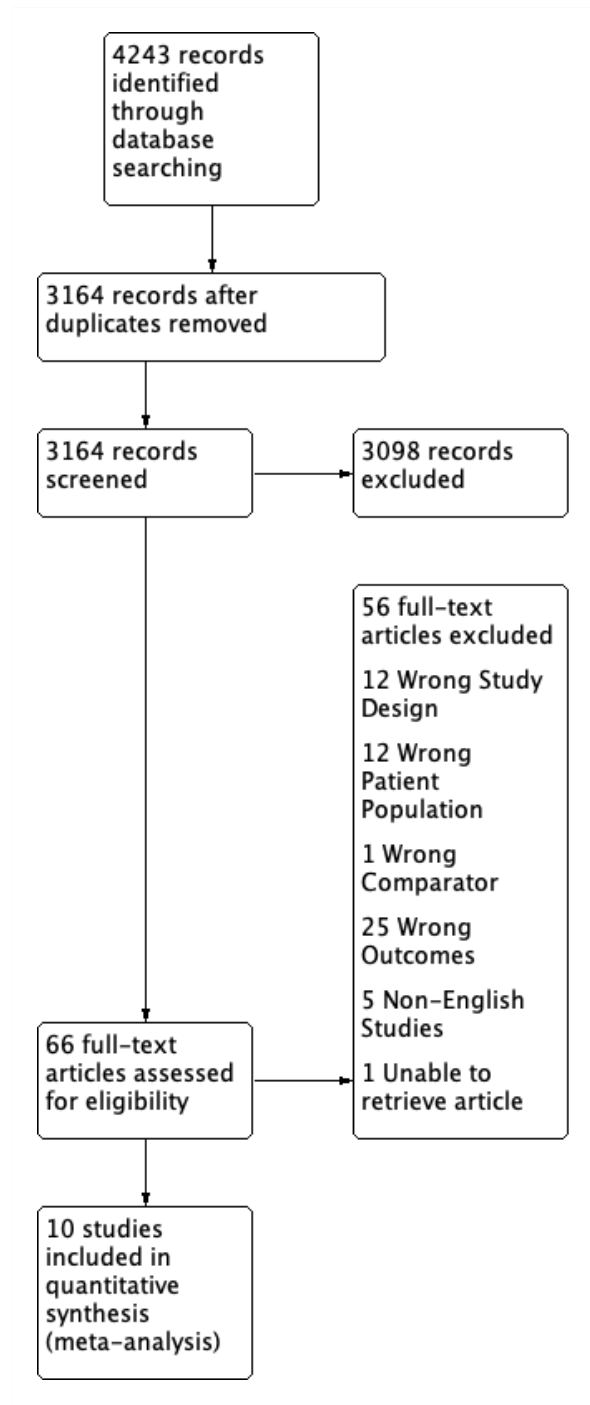

Figure 6: PRISMA study flow: Exercise

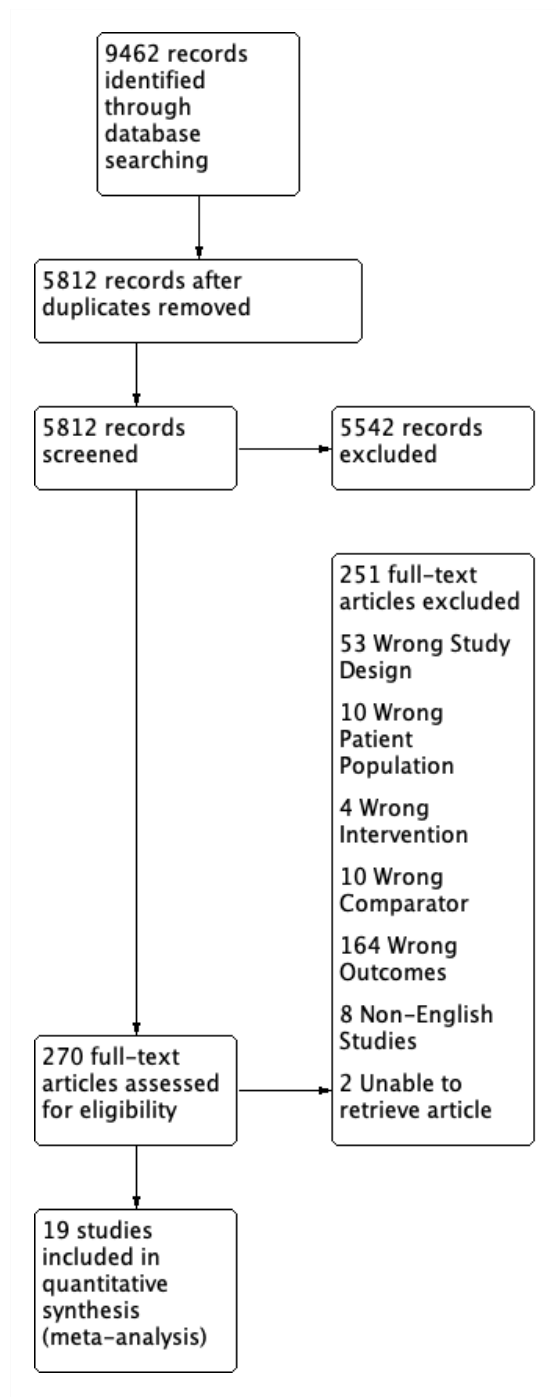

Figure 7: PRISMA study flow: Muscle Relaxants

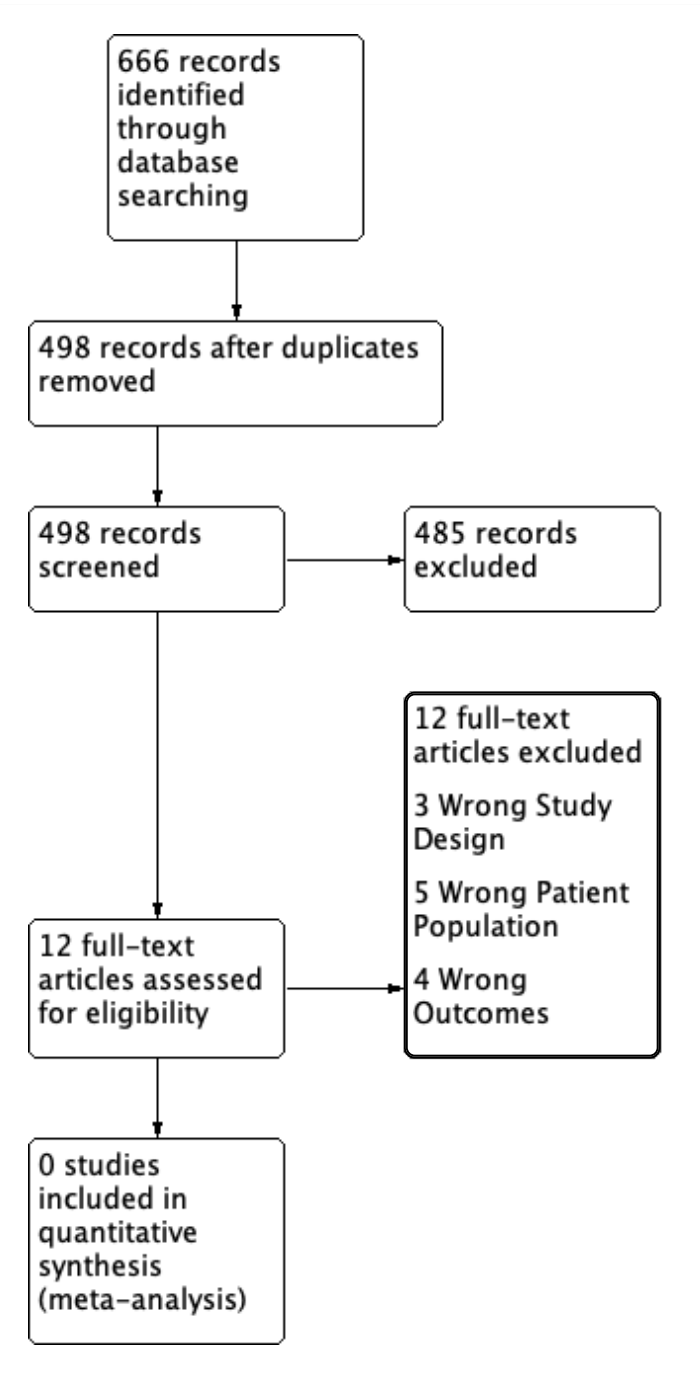

PRISMA—Preferred Reporting Items for Systematic Reviews and Meta-Analyses, RCT—randomized controlled trial

**Figure 8: PRISMA study flow: Opioids**

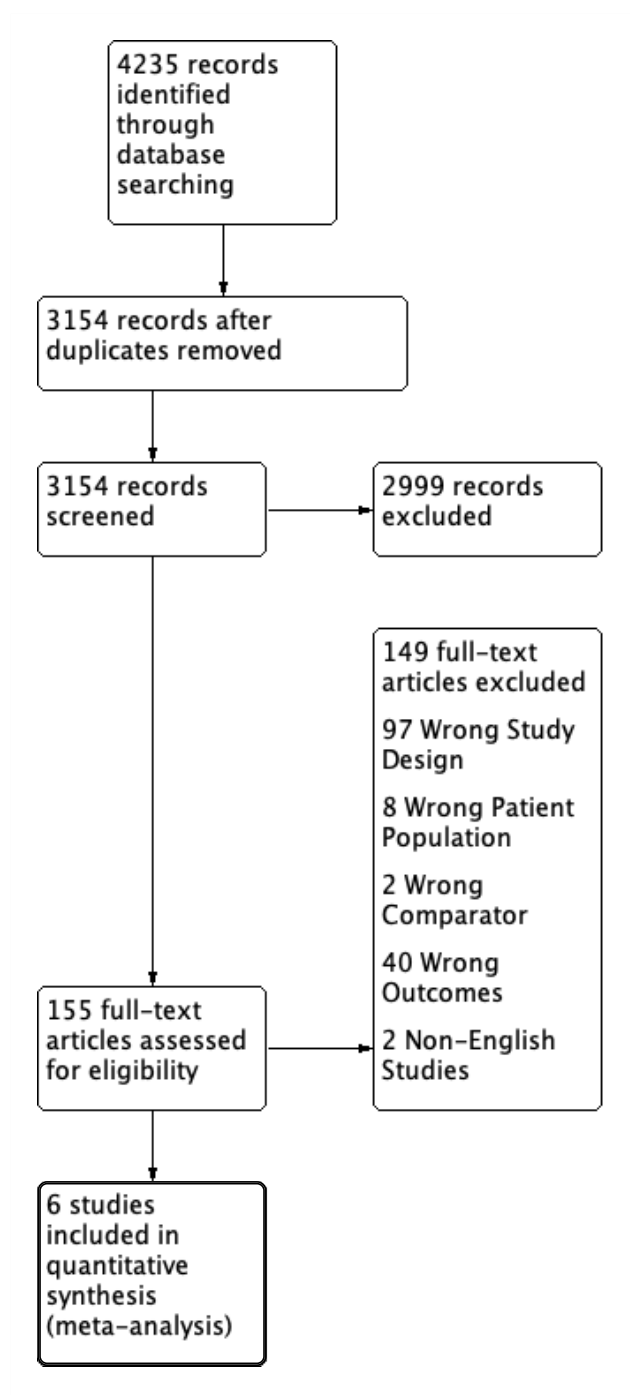

**Figure 9: PRISMA study flow: Oral Non-Steroidal Anti-Inflammatory Drugs**

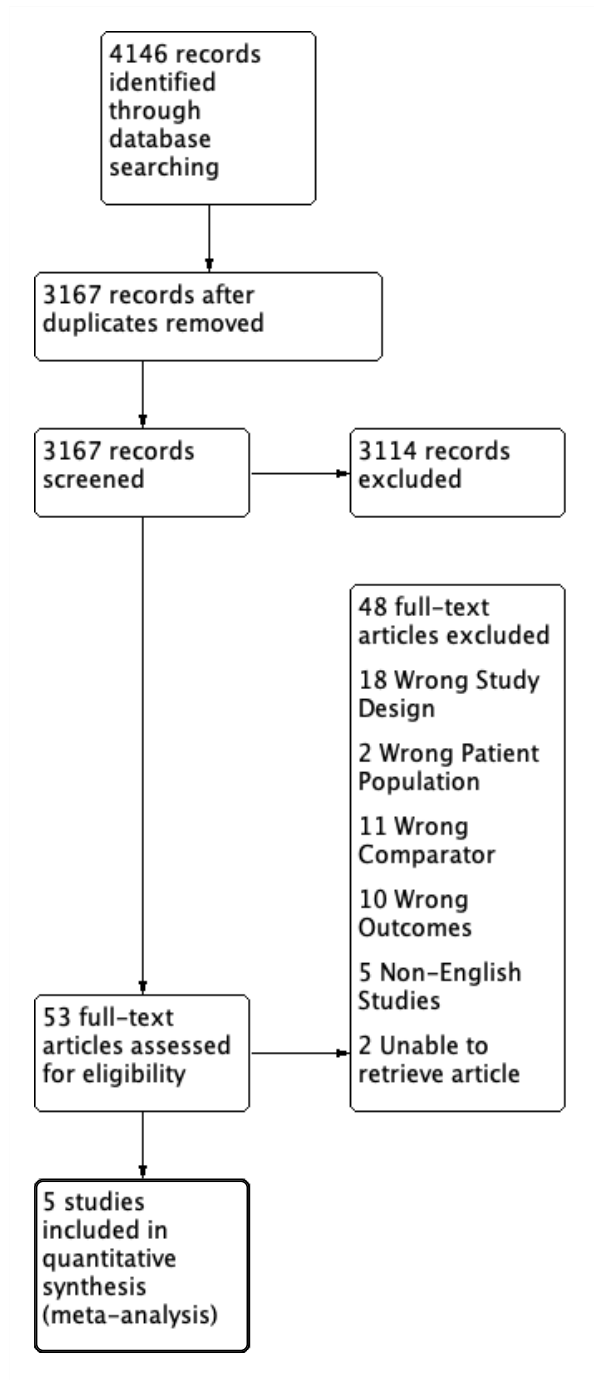

PRISMA—Preferred Reporting Items for Systematic Reviews and Meta-Analyses, RCT—randomized controlled trial

NSAIDs – Non-Steroidal Anti-Inflammatory Drugs



Figure 10: PRISMA study flow: Rubefacients

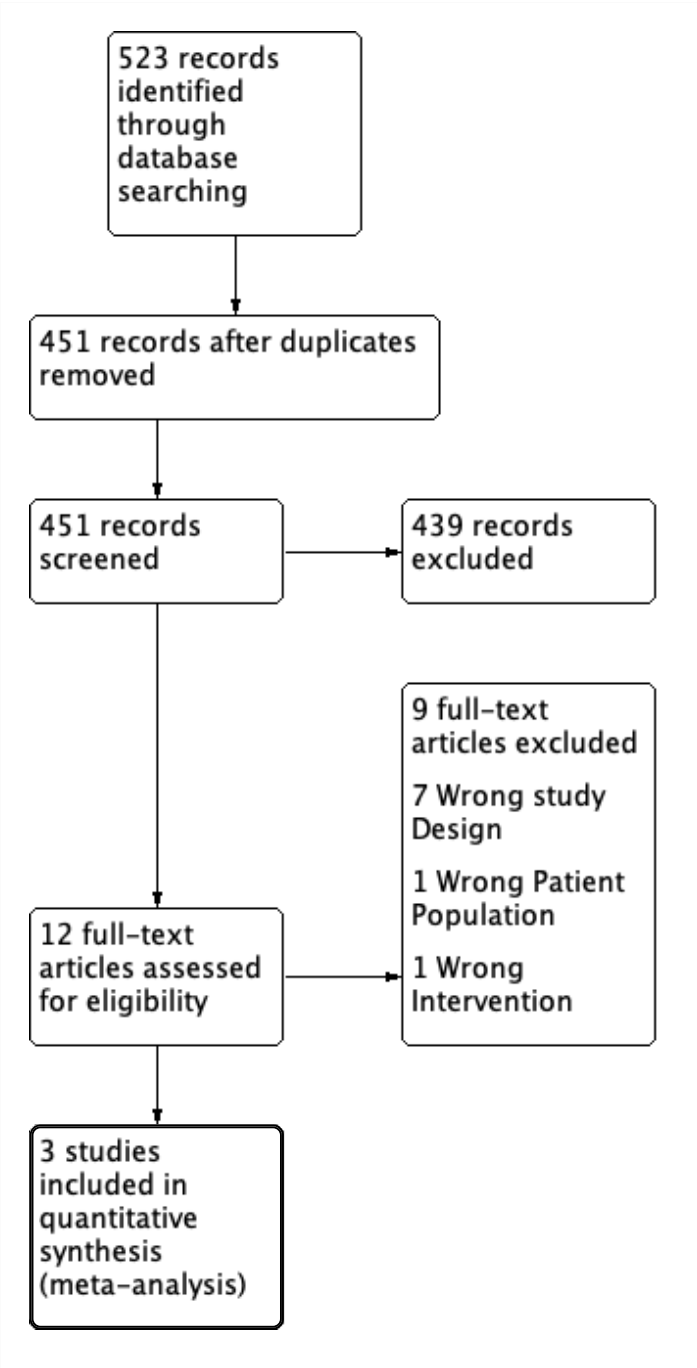

PRISMA—Preferred Reporting Items for Systematic Reviews and Meta-Analyses, RCT—randomized controlled trial

**Figure 11: PRISMA study flow: Serotonin Norepinephrine Reuptake Inhibitors**

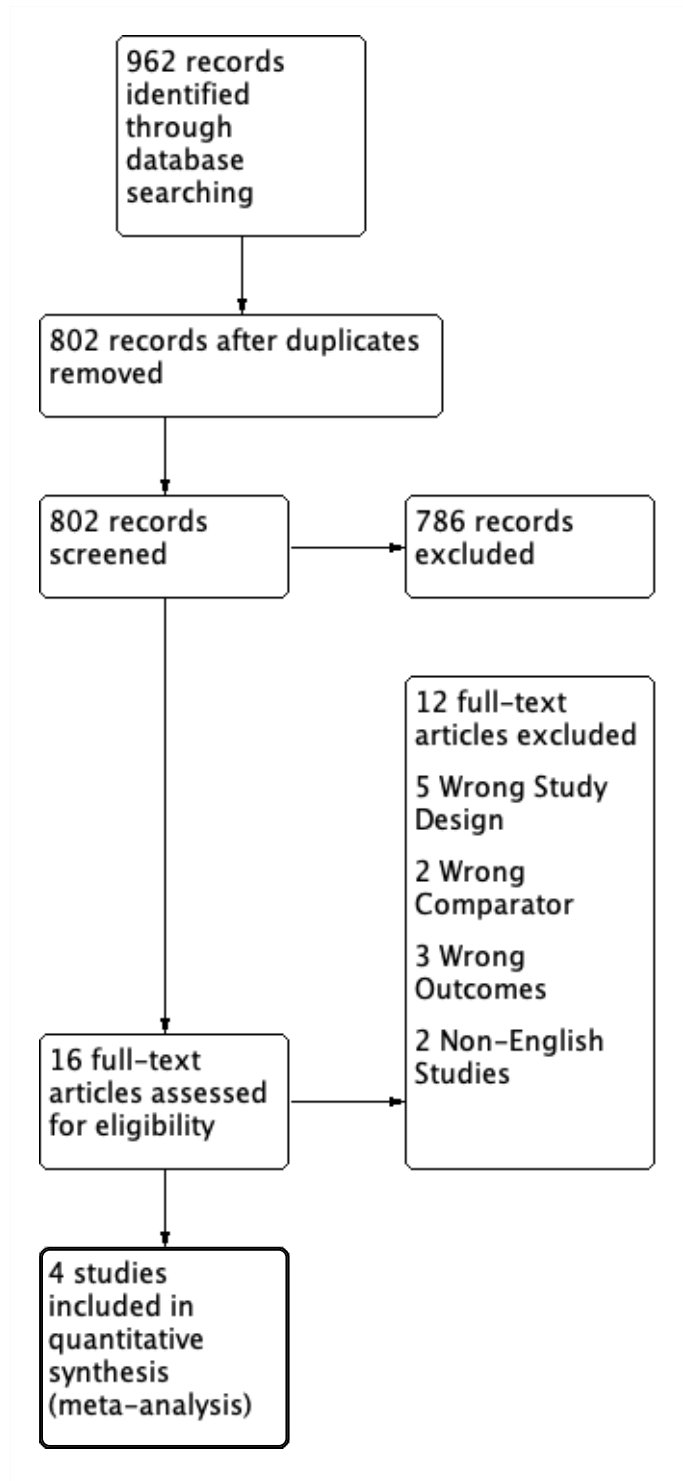

PRISMA—Preferred Reporting Items for Systematic Reviews and Meta-Analyses, RCT—randomized controlled trial

SNRIs—Serotonin Norepinephrine Reuptake Inhibitors

Figure 12: PRISMA study flow: Spinal Manipulation

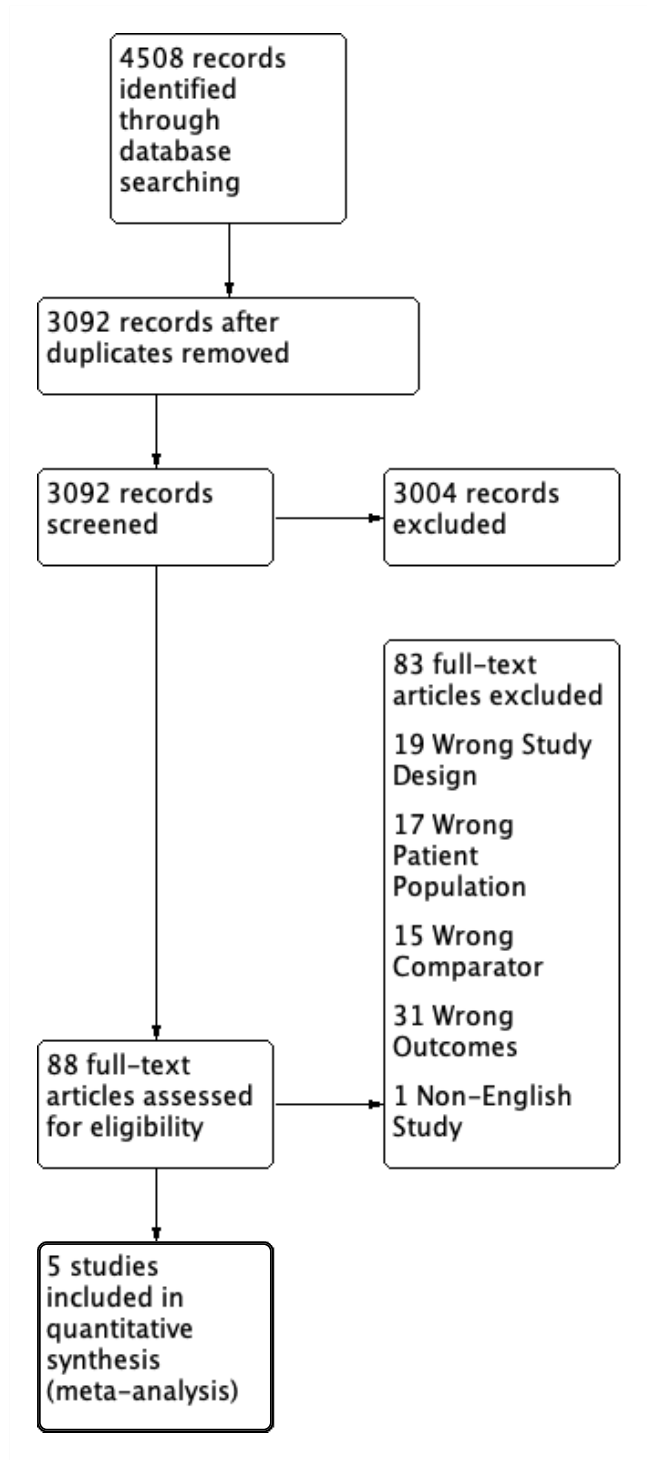

Figure 13: PRISMA study flow: Selective Serotonin Reuptake Inhibitors

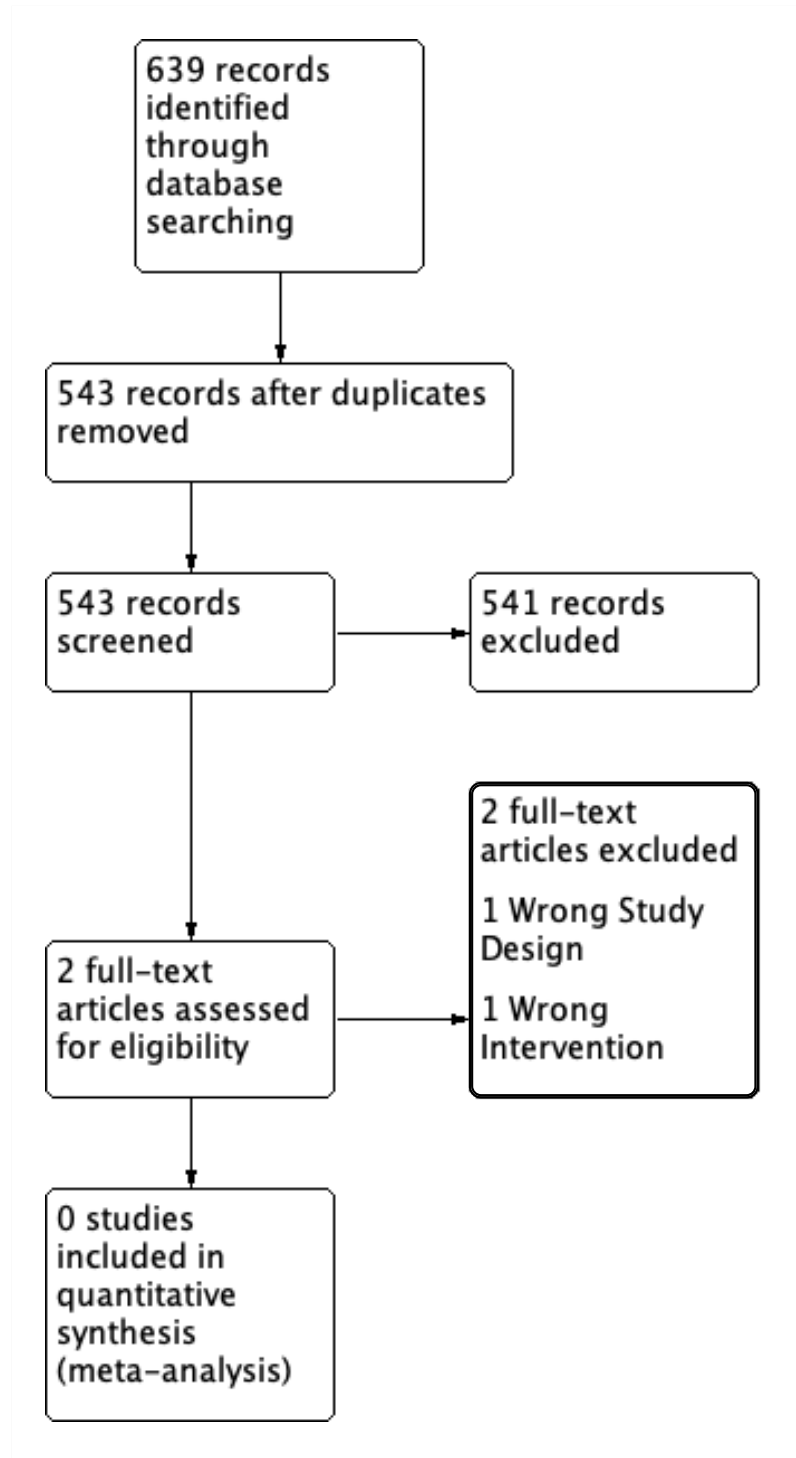

**Figure 14: PRISMA study flow: Tricyclic Antidepressants**

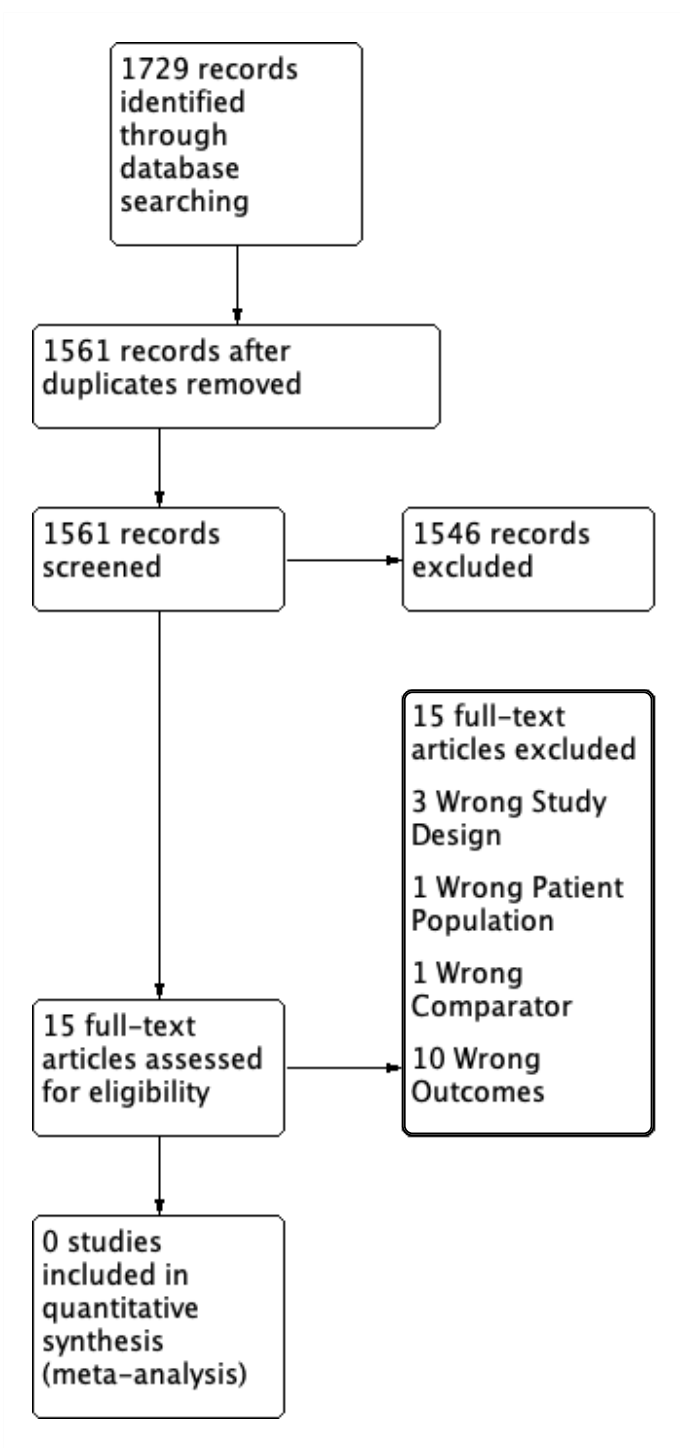

PRISMA—Preferred Reporting Items for Systematic Reviews and Meta-Analyses, RCT—randomized controlled trial

TCAs—Tricyclic Antidepressants

**Figure 15: PRISMA study flow: Topical Non-Steroidal Anti-Inflammatory Drugs**

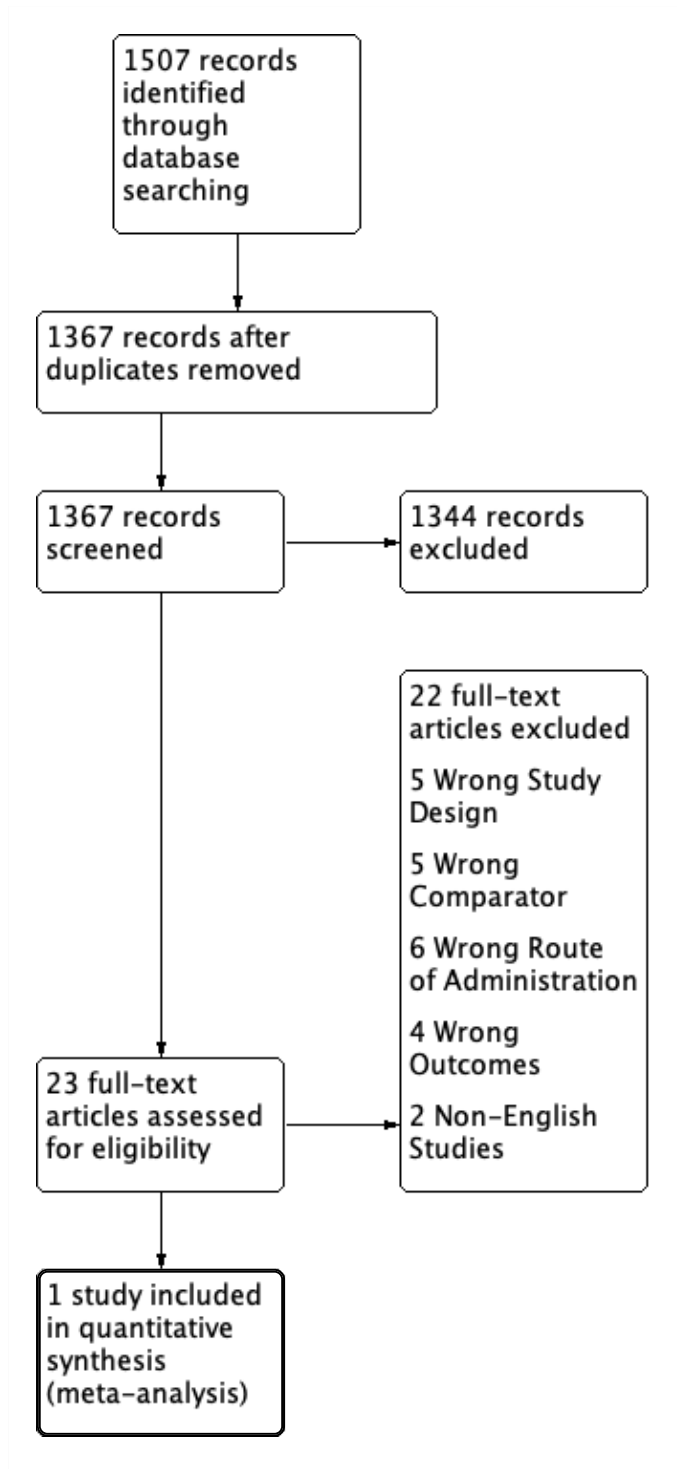

PRISMA—Preferred Reporting Items for Systematic Reviews and Meta-Analyses, RCT—randomized controlled trial

NSAIDs – Non-Steroidal Anti-Inflammatory Drugs
